# Supplementary material for: Synthesis of a coumarin derivative of resorcin[4]arene with solvent-controlled chirality
Source: Royal Society of Chemistry journal article supplement (doi:10.1039/d0ra00368a), 2020-01-01
Supplement: d0ra00368a1.pdf [file d0ra00368a1.pdf]

# Synthesis of coumarin derivative of resorcin[4]arene with solvent- controlled chirality

Anna Szafraniec<sup>a</sup>, Waldemar Iwanek<sup>b\*</sup>

## Supporting Information

### Table of contents

1. Spectral data for compound **(1)**
2. Spectral data for compound **(1)** with chiral auxiliaries
3. HRMS-ESI spectra for compound **(1)**
4. IR spectrum for compound **(1)**
5. UV-VIS and fluorescence spectra for compound **(1)** and 4-hydrozycoumarin
6. Atomic coordinates for DFT calculated geometries and energies of compound **(1)**

## 1. Spectral data for compound (1).

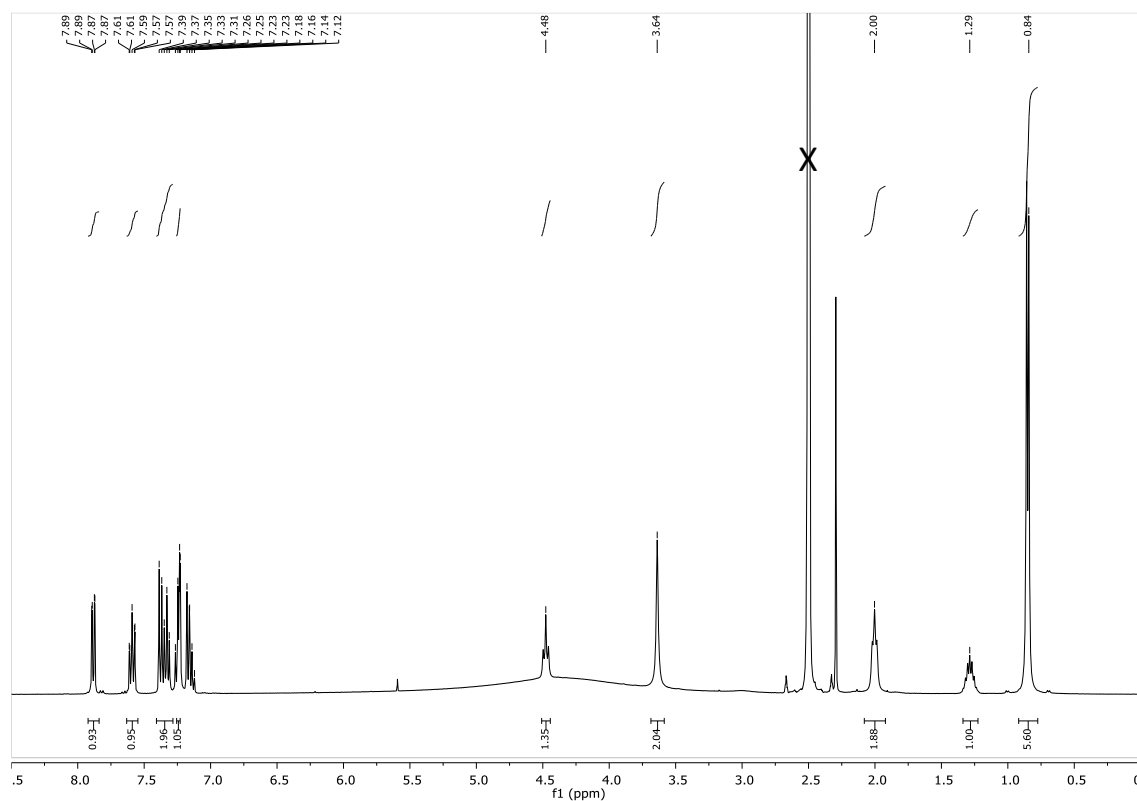

**Figure S1.**  $^1\text{H}$  NMR spectrum of compound (1) (400 MHz,  $\text{DMSO-d}_6$ ). The signals of  $\text{DMSO-d}_6$  have been crossed out.

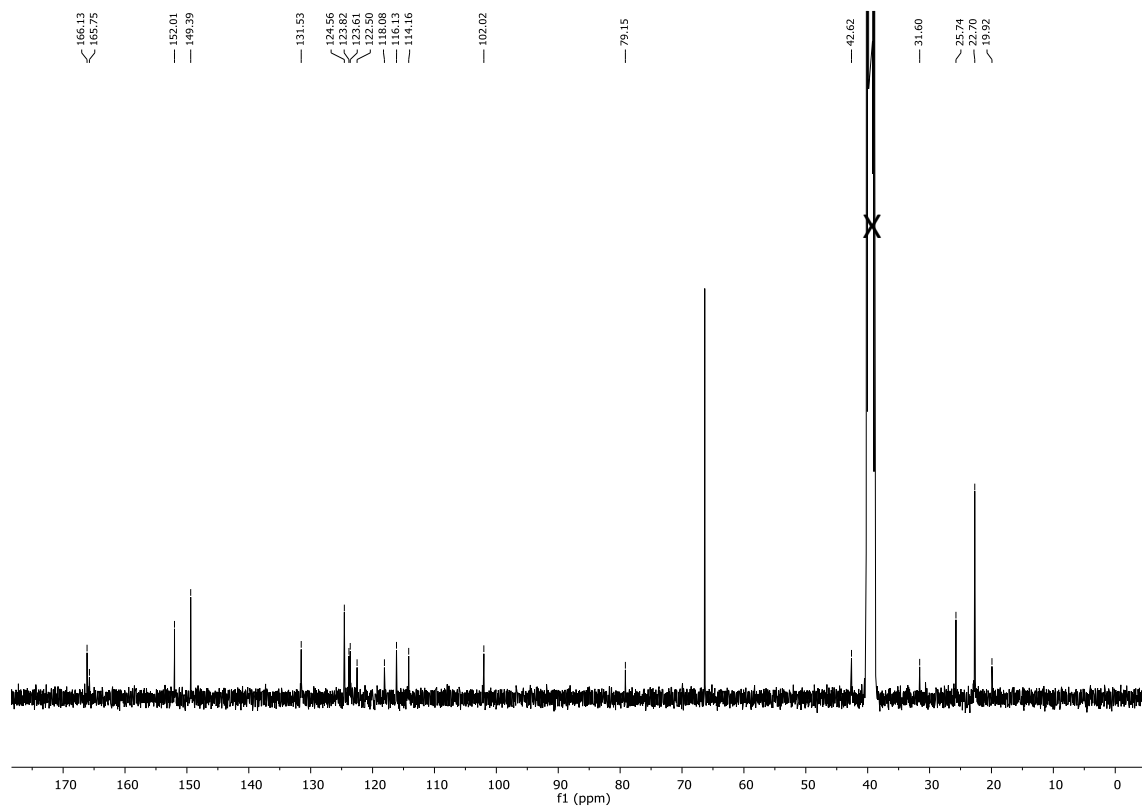

**Figure S2.**  $^{13}\text{C}$  NMR spectrum of compound (1) (400 MHz,  $\text{DMSO-d}_6$ ). The signals of  $\text{DMSO-d}_6$  have been crossed out.

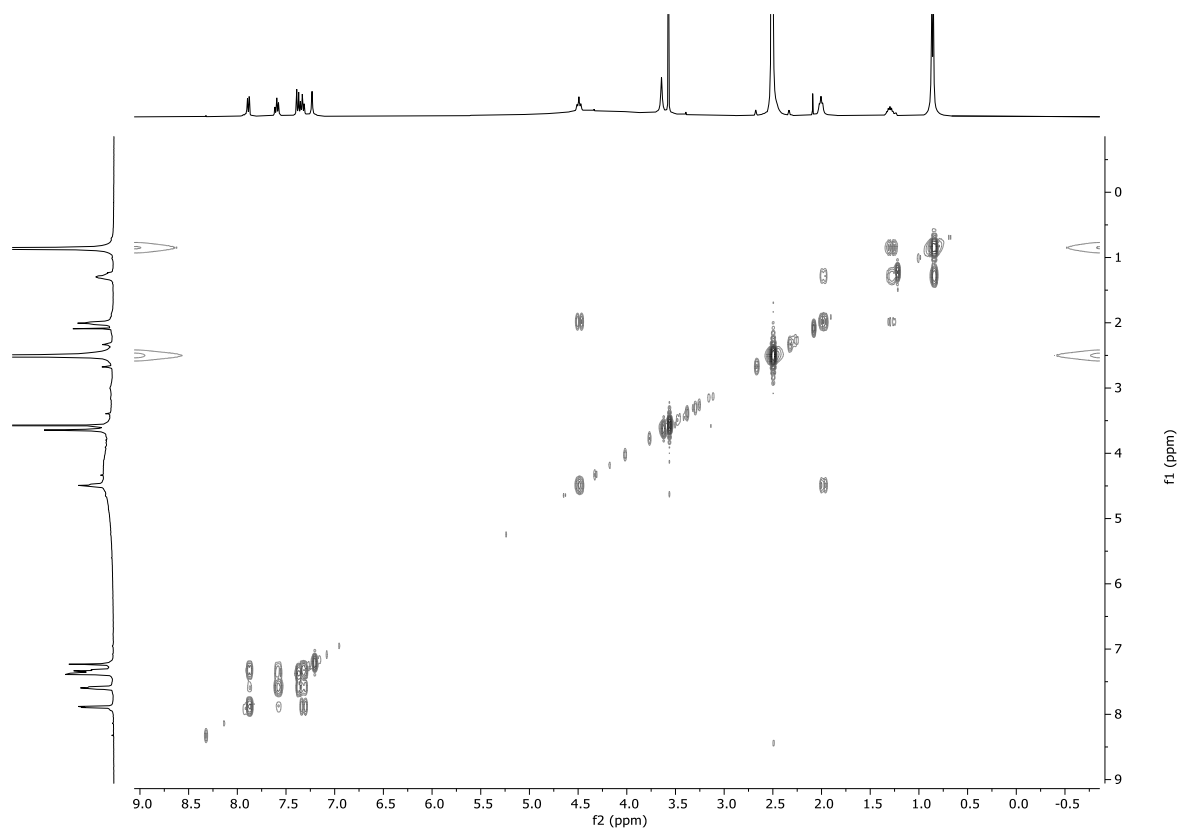

**Figure S3.** COSY ( $^1\text{H}$ - $^1\text{H}$ ) spectrum of compound (**1**) (400 MHz, DMSO- $d_6$ ).

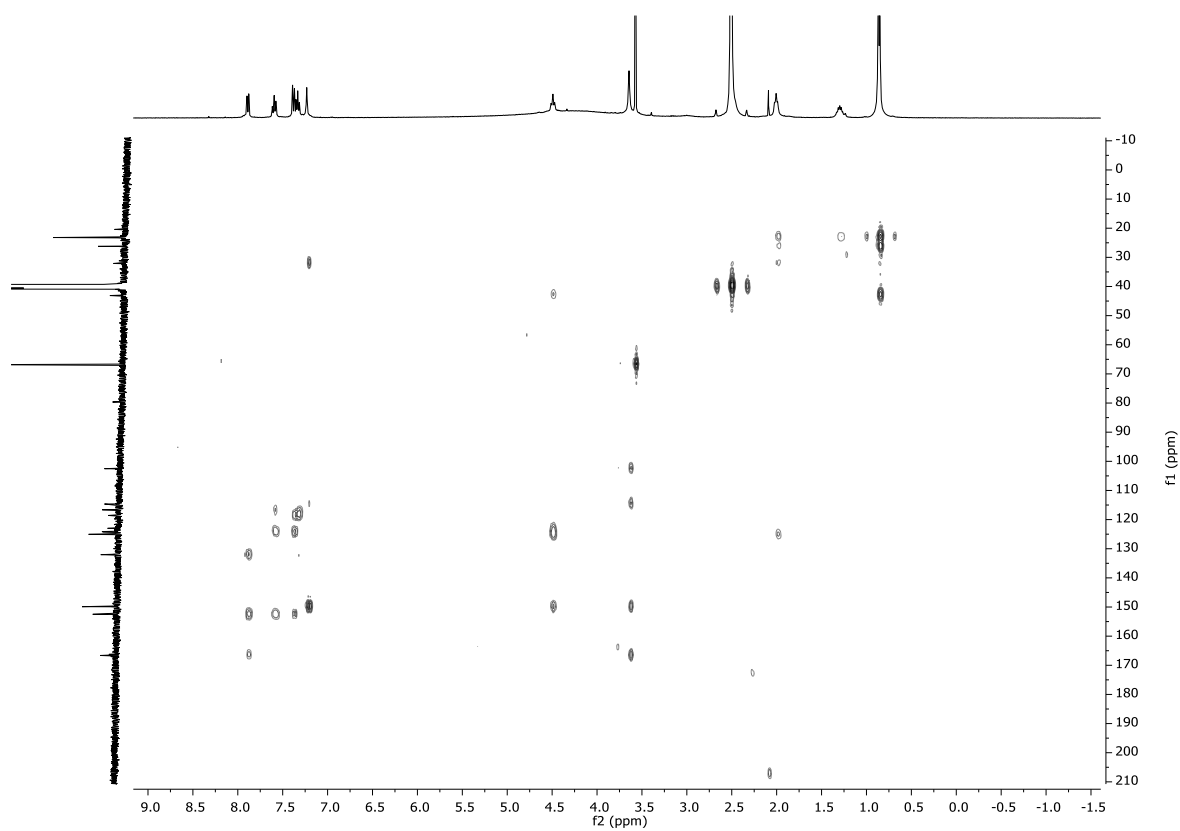

**Figure S4.** COSY ( $^1\text{H}$ - $^{13}\text{C}$ ) spectrum of compound (**1**) (400 MHz, DMSO- $d_6$ ).

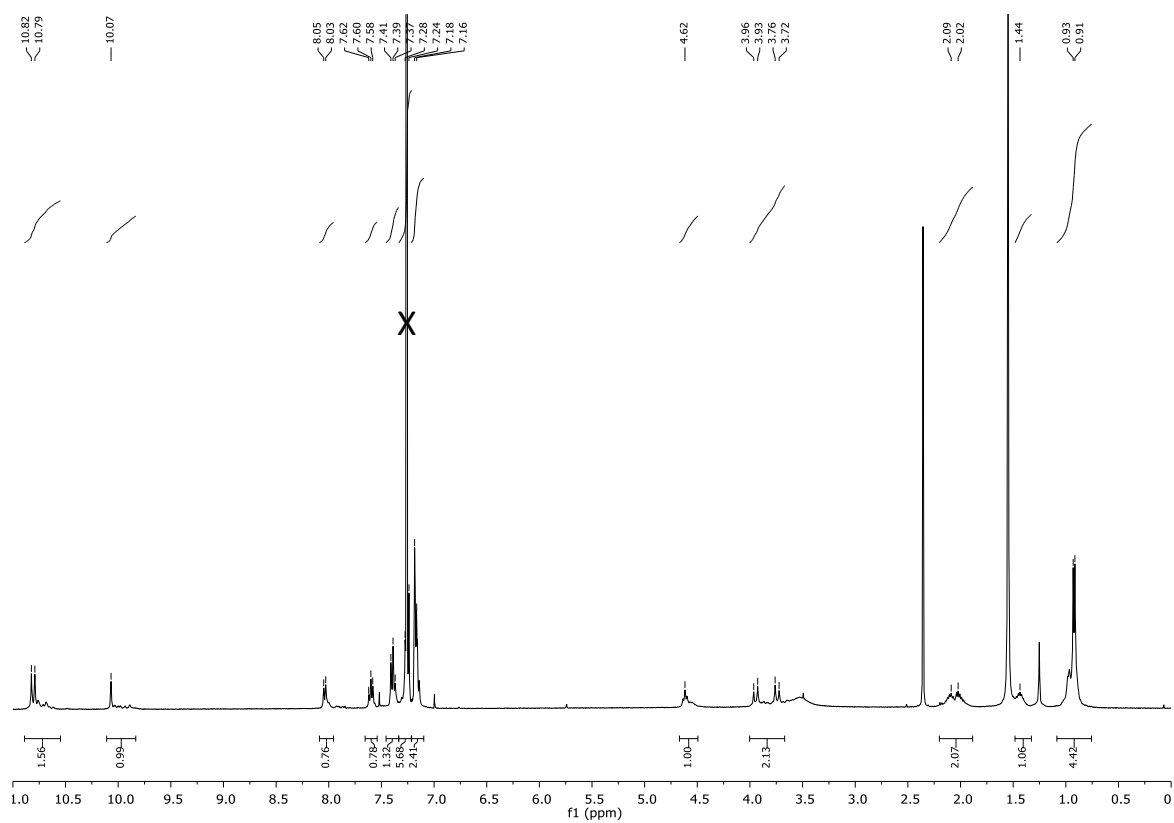

**Figure S5.**  $^1\text{H}$  NMR spectrum of compound (1) (400 MHz,  $\text{CDCl}_3$ ). The signals of  $\text{CDCl}_3$  have been crossed out.

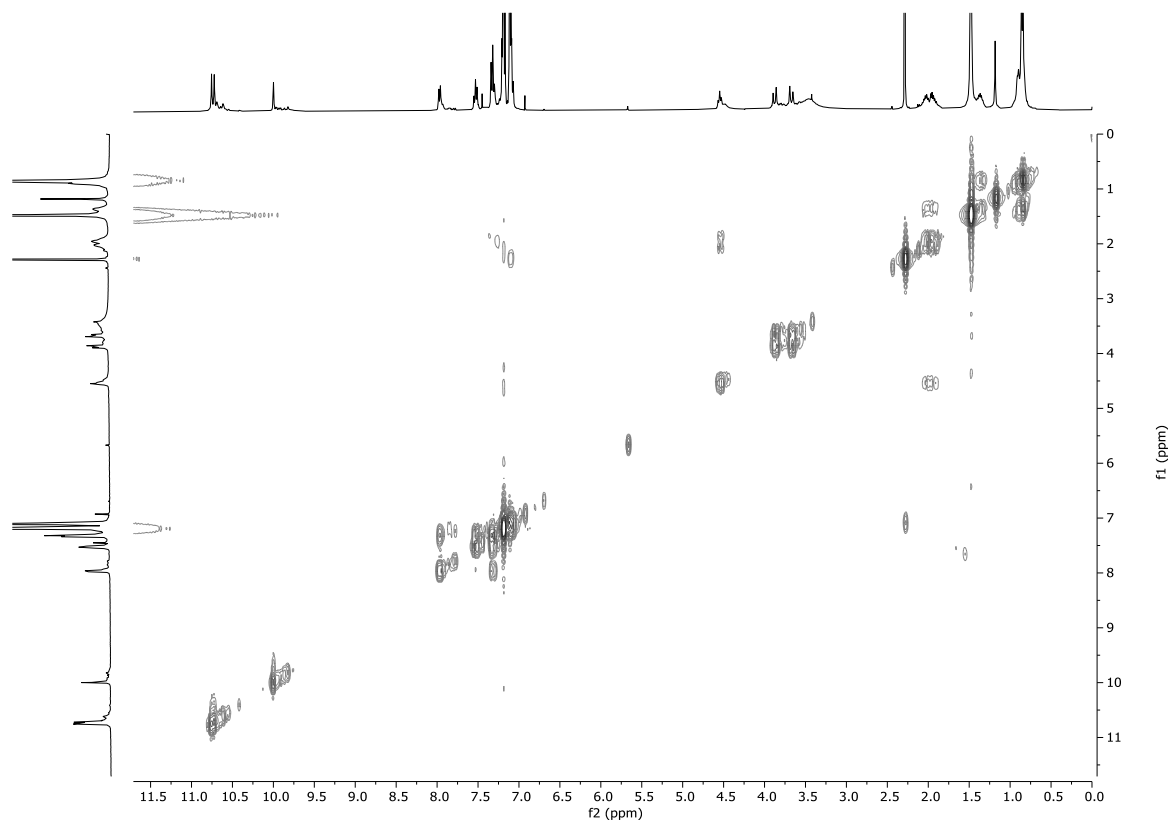

**Figure S6.** COSY ( $^1\text{H}$ - $^1\text{H}$ ) spectrum of compound (1) (400 MHz,  $\text{CDCl}_3$ ).

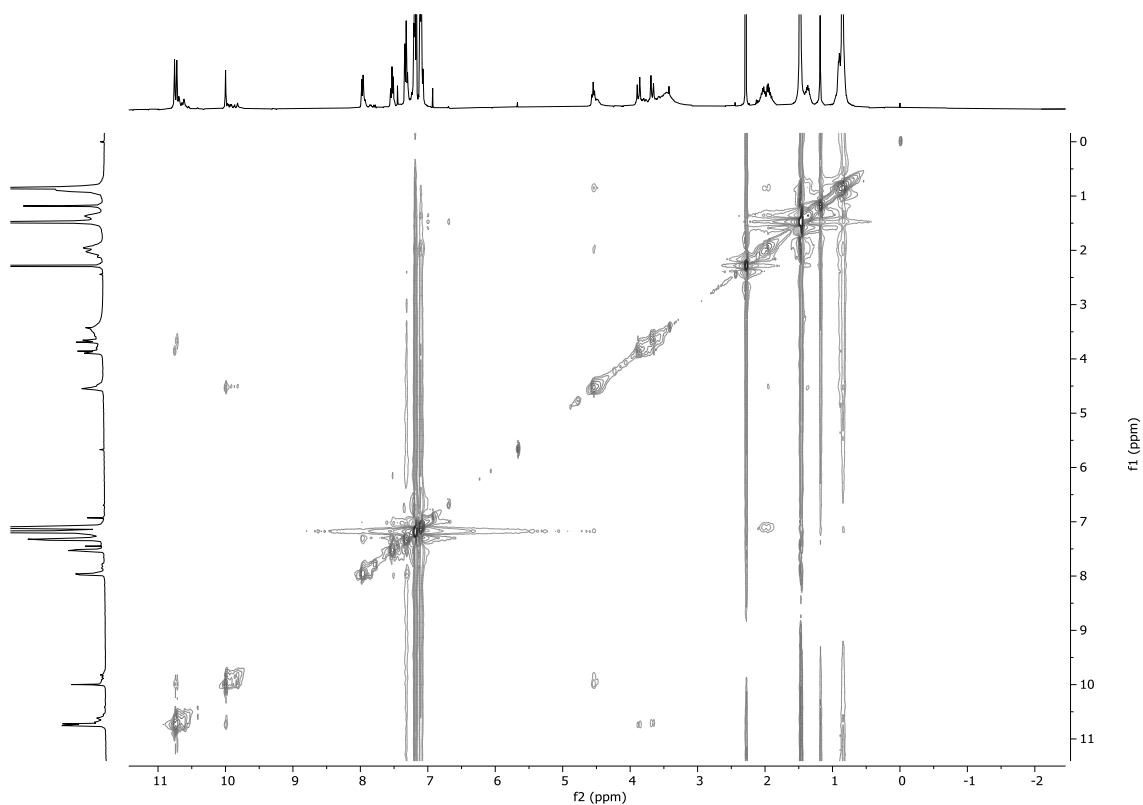

**Figure S7.** ROESY ( $^1\text{H}$ - $^1\text{H}$ ) spectrum of compound (**1**) (400 MHz,  $\text{CDCl}_3$ ).

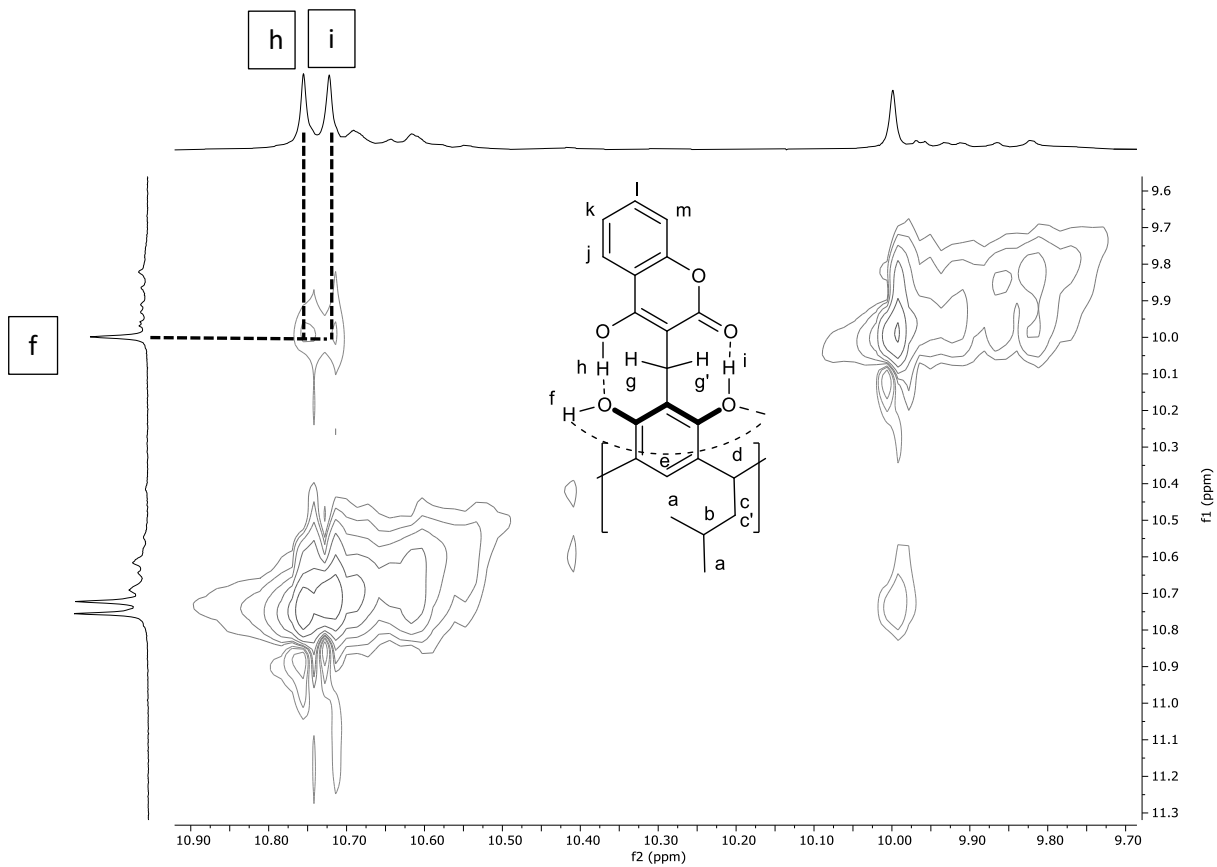

**Figure S8.** Fragment of ROESY ( $^1\text{H}$ - $^1\text{H}$ ) spectrum of compound (**1**) (400 MHz,  $\text{CDCl}_3$ ) at 298  $^\circ\text{C}$ . Interaction of hydroxyl group OH(**f**) with hydroxyl groups OH (**h,i**).

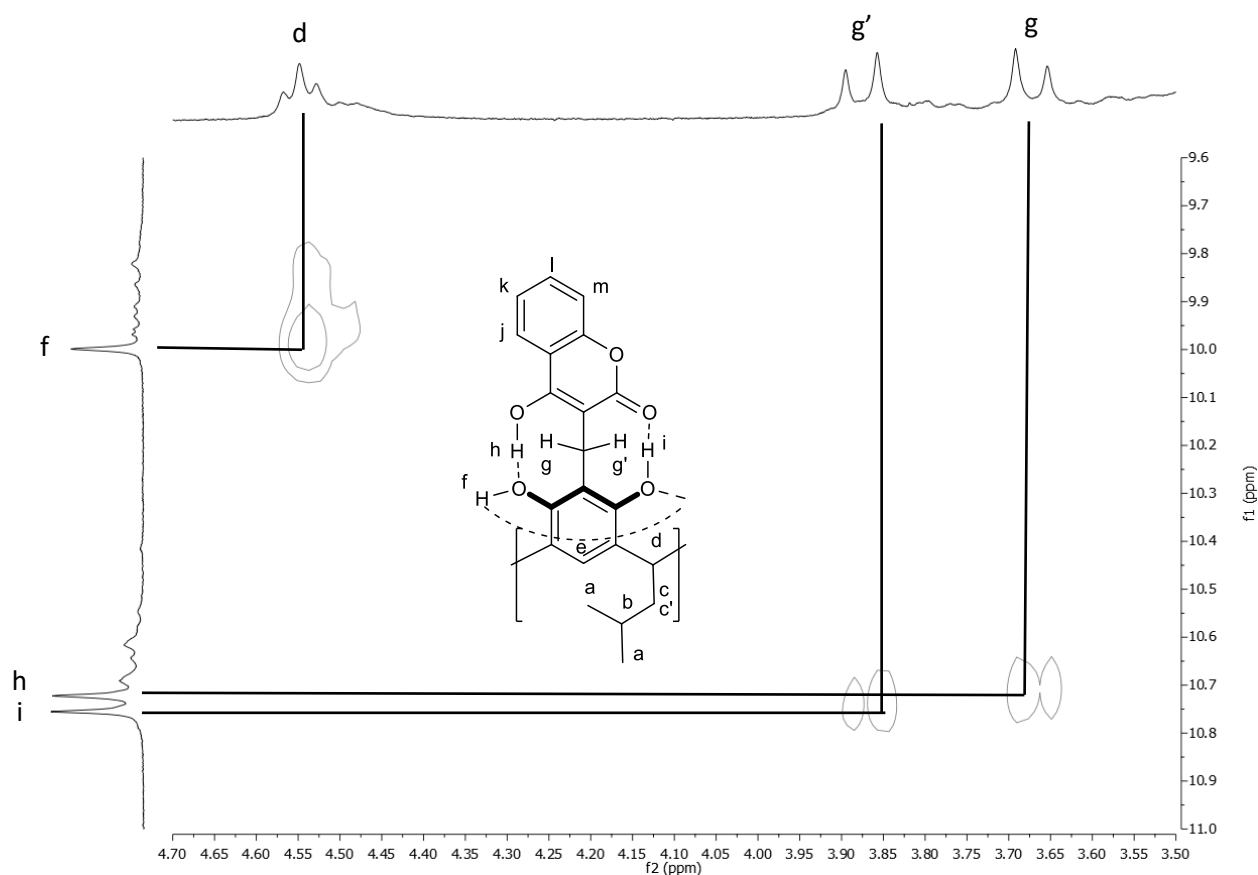

**Figure S9.** Fragment of the ROESY spectrum of compound (**1**) in CDCl<sub>3</sub> at 298 °C.

The proton of the hydroxyl group OH (**f**) of the resorcin[4]arene was in close proximity to the proton of the methine group (**d**) of the lower rim of the resorcin[4]arene. The OH proton (**i**) of resorcin[4]arene interacted with the carbonyl group from the coumarin part of the resorcin[4]arene and was adjacent to the proton of the methylene group (**g'**). The proton from the hydroxyl group OH (**h**) of the coumarin portion stayed in contact with the second proton of the rigid methylene group (**g**).

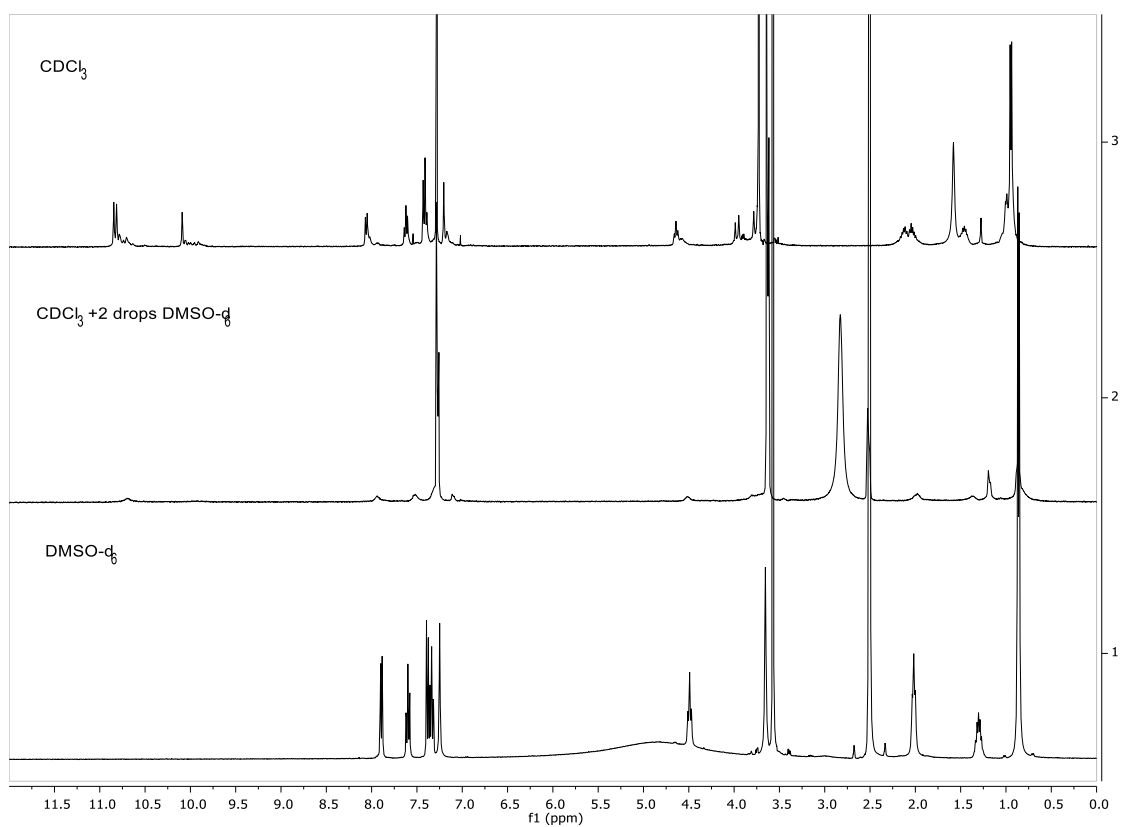

**Figure S10.**  $^1\text{H}$  NMR spectrum of compound (1) (400 MHz): above,  $^1\text{H}$  NMR spectrum in  $\text{CDCl}_3$ ; inside  $^1\text{H}$  NMR spectrum in  $\text{CDCl}_3 + 2$  drops of  $\text{DMSO-d}_6$ ; bottom  $^1\text{H}$ -NMR spectrum in  $\text{DMSO-d}_6$

## 2. Spectral data for compound (1) with chiral auxiliaries

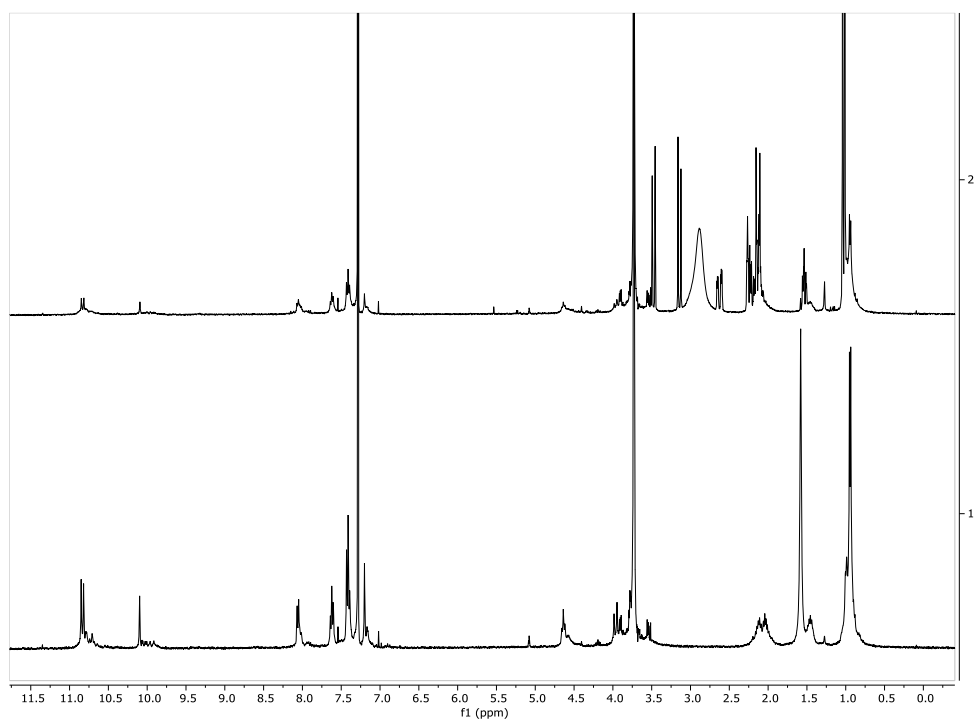

**Figure S11.**  $^1\text{H}$  NMR spectrum of compound (1) (400 MHz,  $\text{CDCl}_3$ ): at the top  $^1\text{H}$  NMR spectrum after adding 4 equivalents of  $D(+)$ -camphorsulfonic acid; bottom  $^1\text{H}$ -NMR spectrum in chloroform .

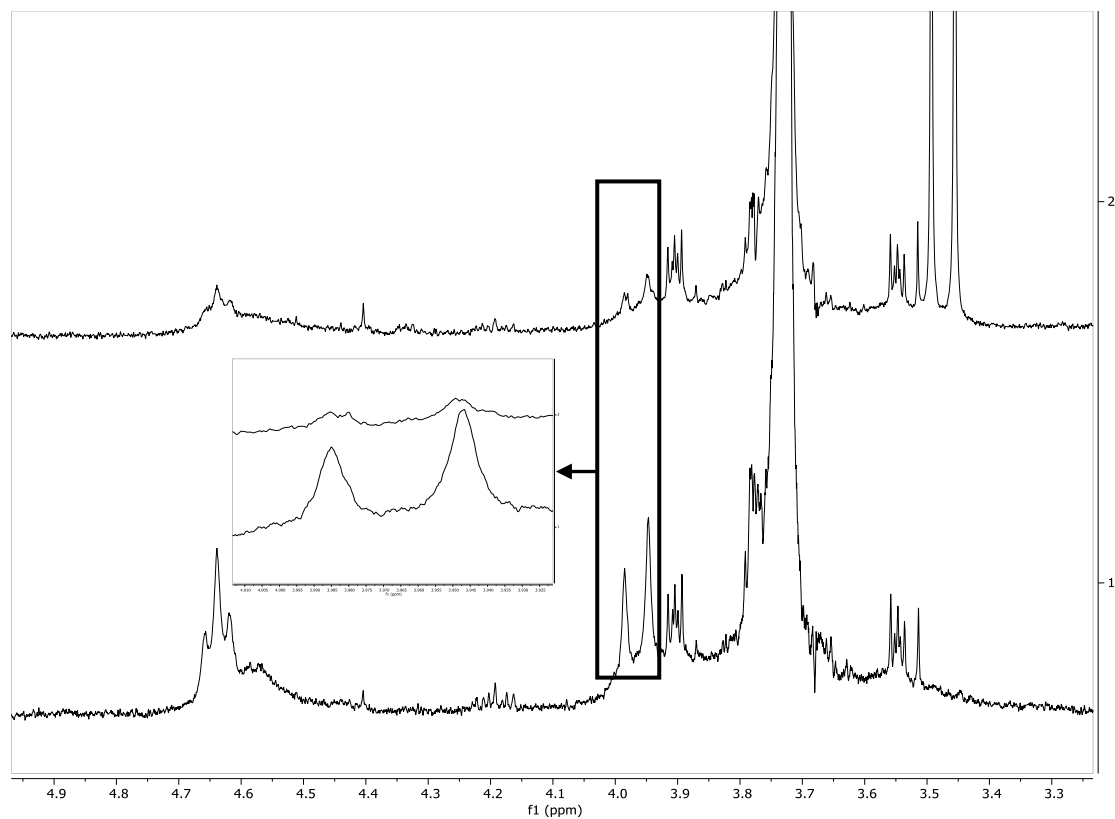

**Figure S12.** Enlarged fragment of  $^1\text{H}$  NMR spectrum of compound (1) (400 MHz,  $\text{CDCl}_3$ ) with  $D(+)$ -camphorsulfonic acid. The area of one of the diastereotopic protons (g') is marked in frame: at the top with  $D(+)$ -camphorsulfonic acid; bottom without  $D(+)$ -camphorsulfonic acid.



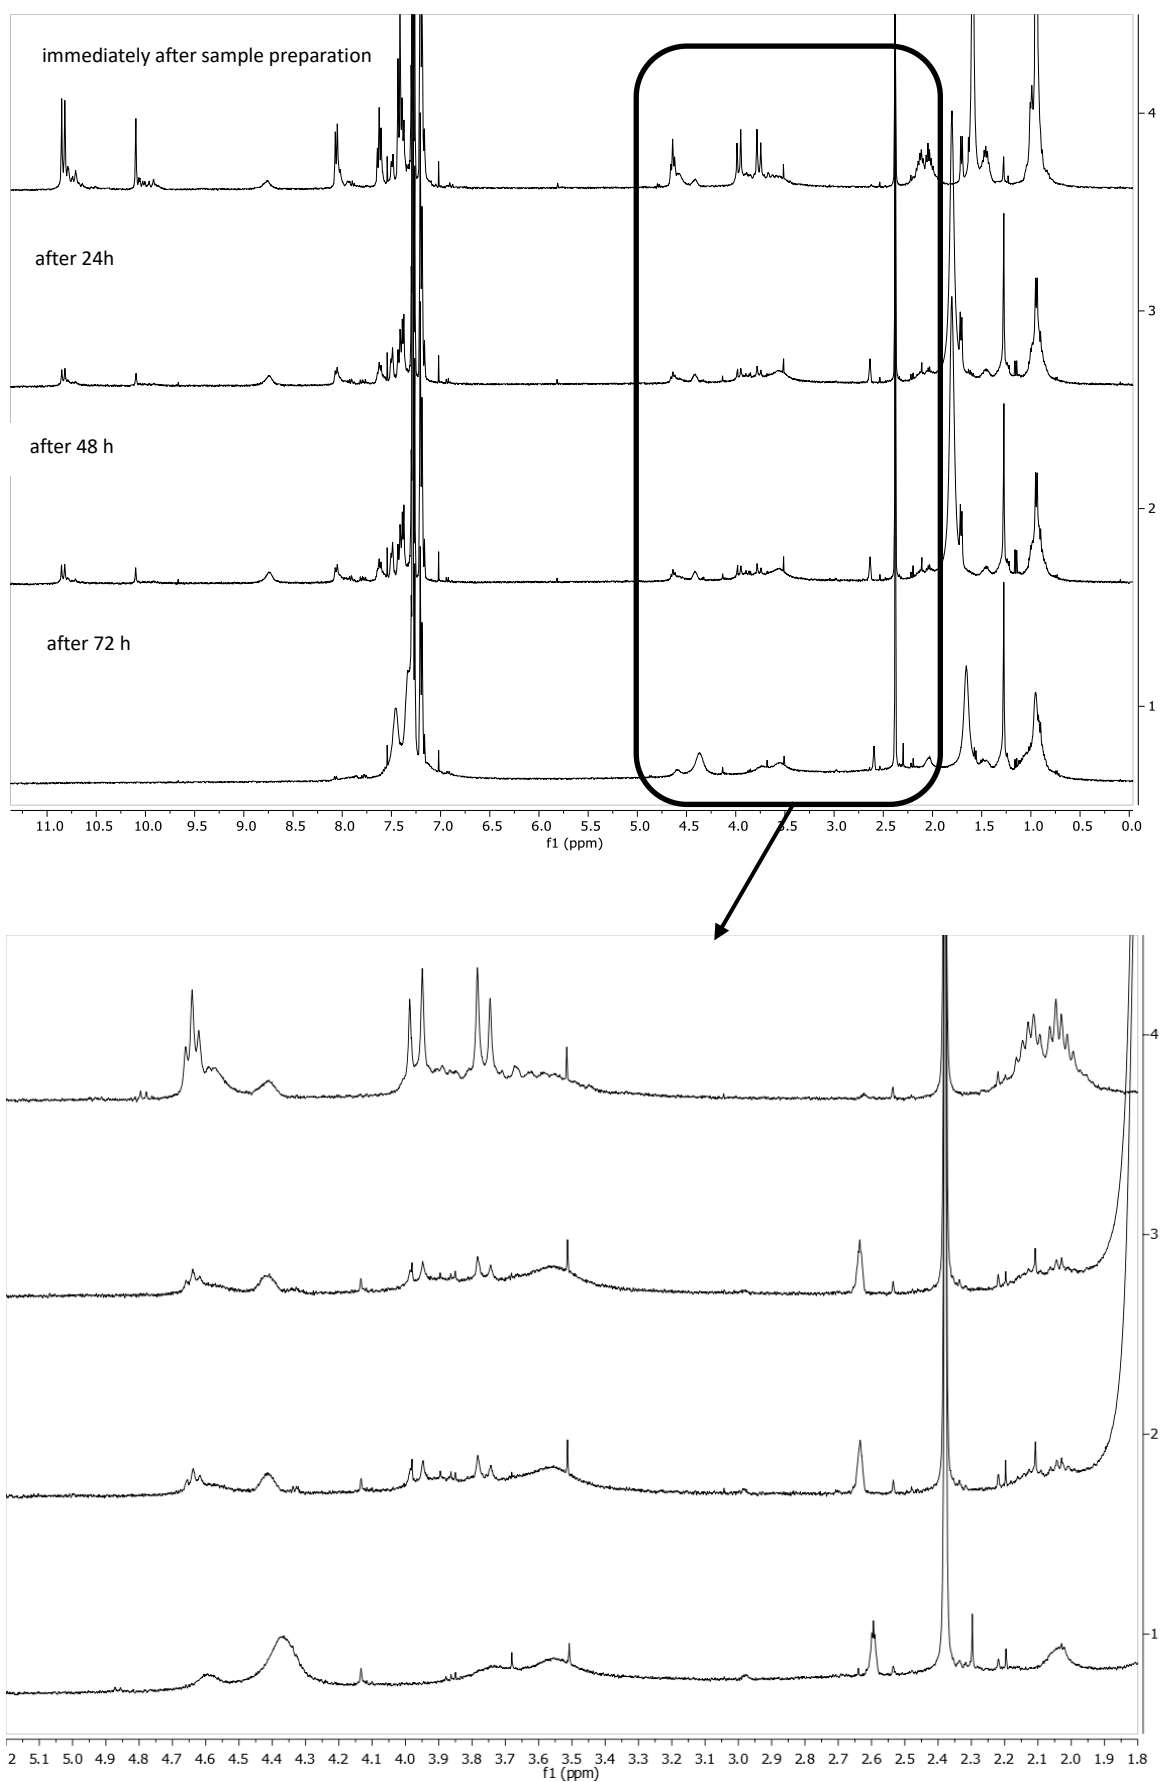

**Figure S13.**  $^1\text{H}$  NMR spectrum of compound **(1)** (400 MHz,  $\text{CDCl}_3$ ) in the presence of 4 equivalents of *S*(-)-phenylethylamine: at the top the spectrum after adding 4 equivalents of *S*(-)-Phenylethylamine and its change over time 24, 48 and 72 hours; bottom an enlarged fragment marked with a frame.

## 3. HRMS-ESI spectra for compound (1)

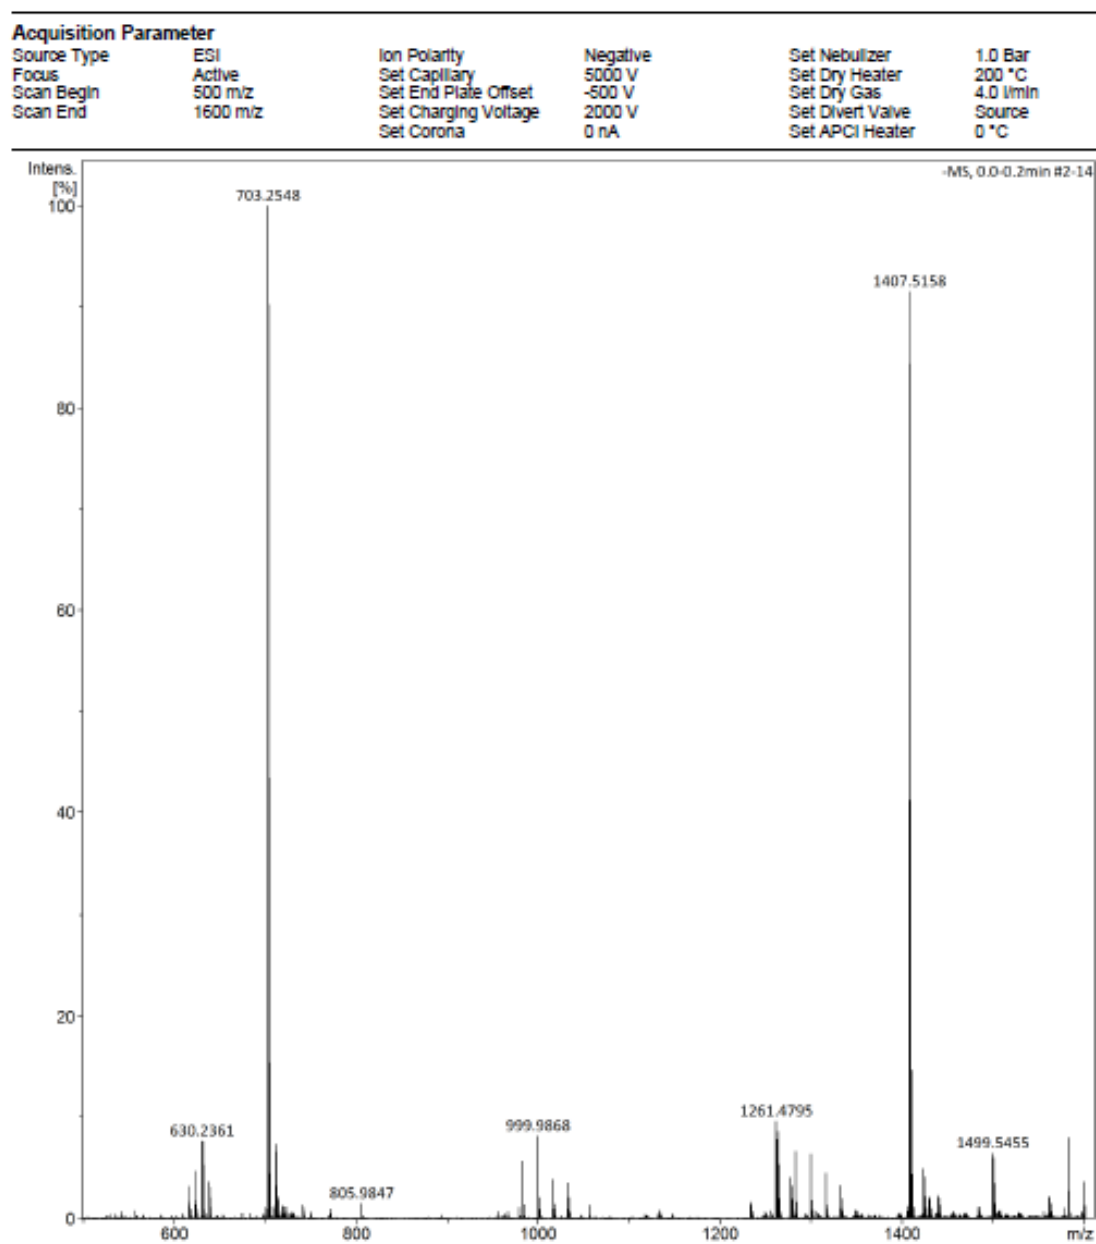

Figure S14. HRMS-ESI spectrum of compound (1).

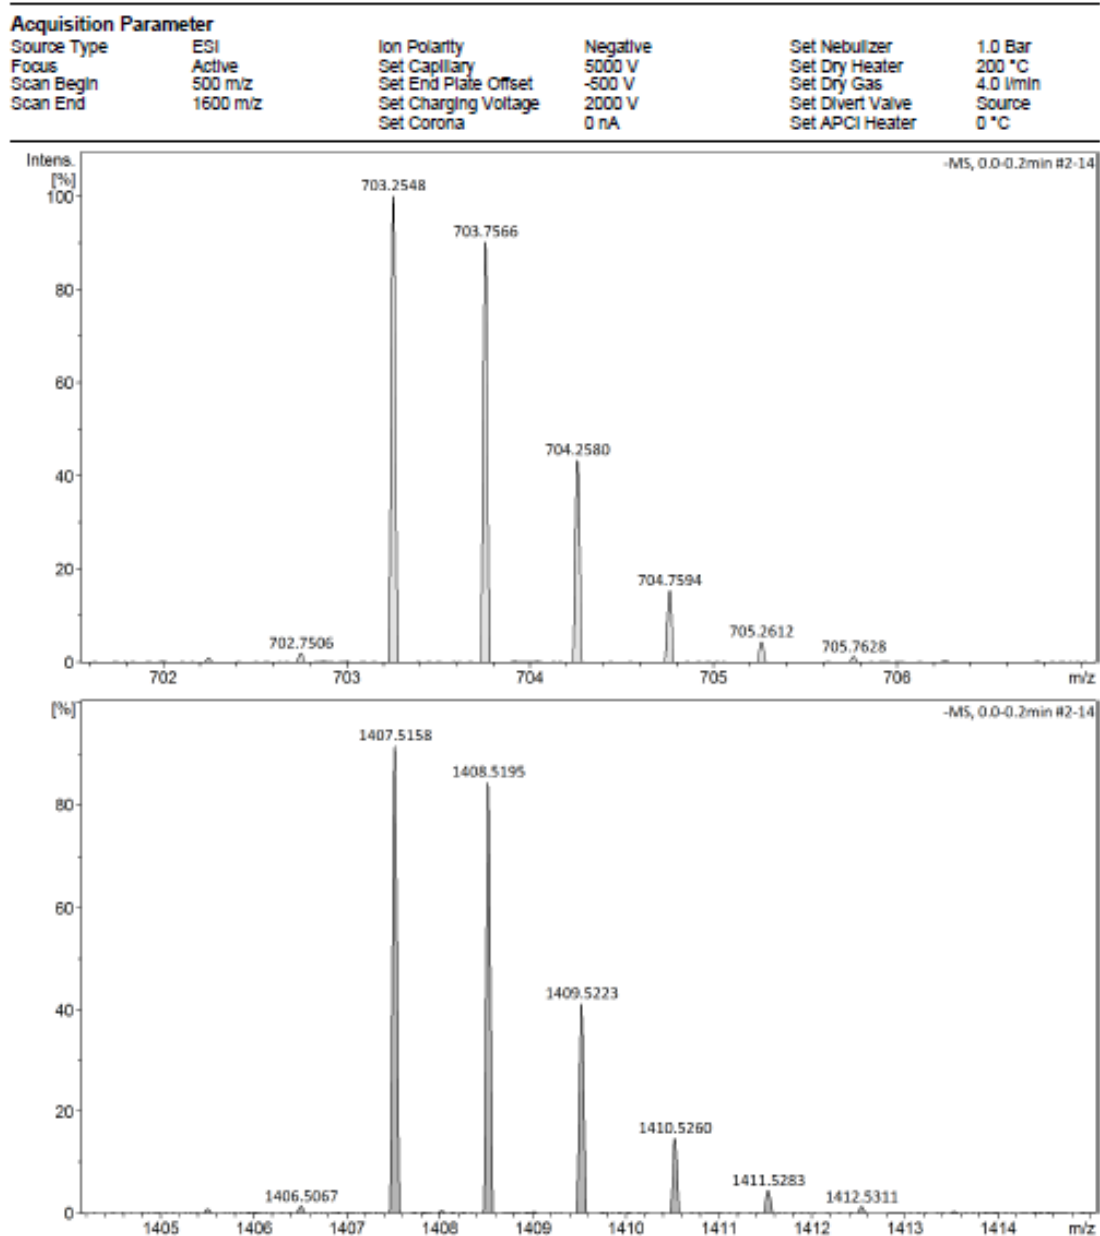

Figure S15. Isotope profiles of compound (1).

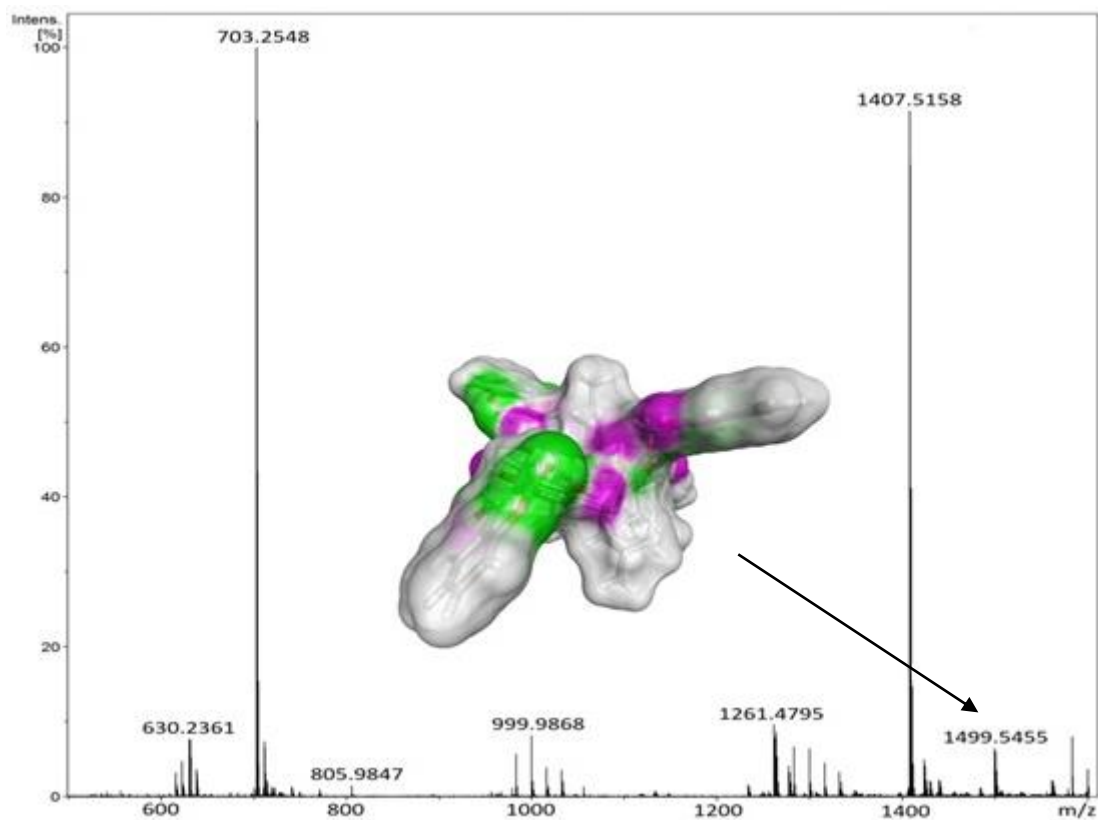

**Figure S16.** HRMS spectrum of compound (**1**) performed in negative ionization mode with a peak corresponding to the formation of the compound (**1**) complex with toluene.

The calculated model of the coumarin[4]arene-toluene complex by the PM7 method using the MOPAC program<sup>1</sup> with marked areas of hydrogen bonds and van der Waals clouds.

<sup>1</sup> MOPAC2016, J.J.P. Stewart, Stewart Computational Chemistry, Colorado Springs, CO, USA

#### 4. IR spectrum for compound (1)

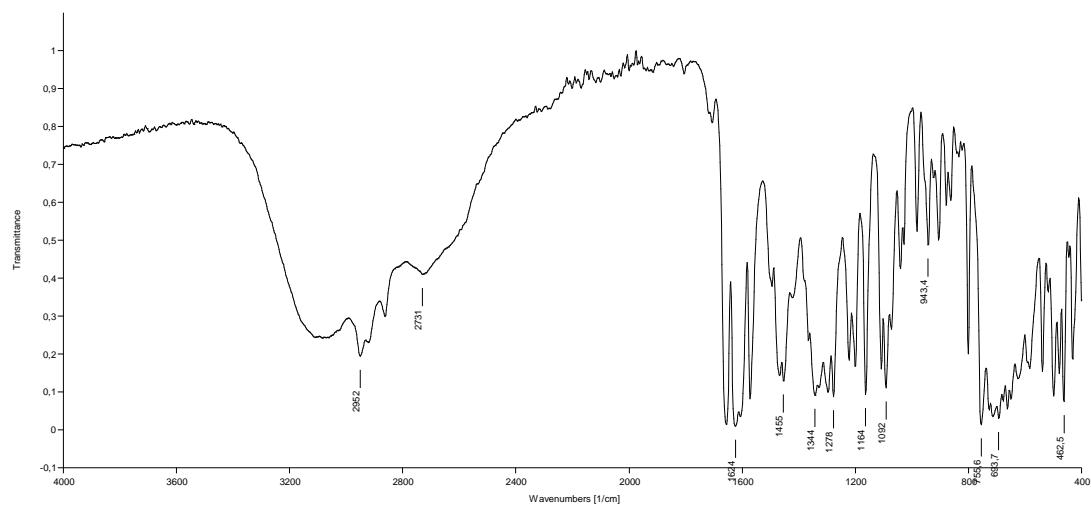

**Figure S17.** IR spectrum (ATR) of compounds (1).

## 5. UV-VIS and fluorescence spectra for compound (1) and 4-hydroxycoumarin

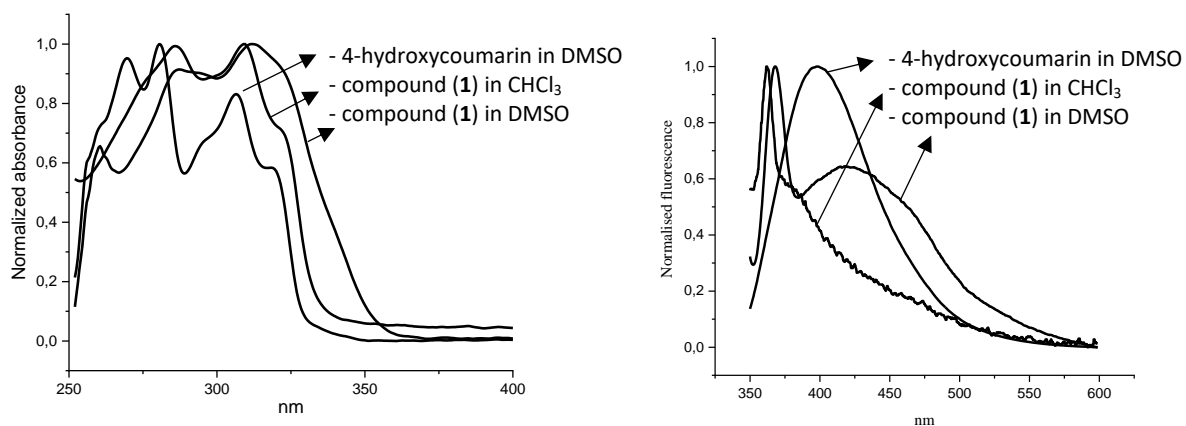

**Figure S18.** Normalized UV-VIS and fluorescence spectra of compound (1) and 4-hydroxycoumarin: on the left the absorption spectra of coumarin[4]arene ( $2.64 \times 10^{-6} \text{ M}$ ) in DMSO and chloroform and 4-hydroxycoumarin ( $7.03 \times 10^{-7} \text{ M}$ ) in DMSO; on the right side fluorescence spectra of coumarin[4]arene **1** ( $\lambda_{\text{exc}} = 320 \text{ nm}$ ) in DMSO and chloroform and 4-hydroxycoumarin ( $\lambda_{\text{exc}} = 320 \text{ nm}$ ) in DMSO.

## 6. Atomic coordinates for DFT calculated geometries and energies of compound (1)

All calculations were performed within the density functional theory (DFT) using Gaussian 09 program suite. Geometries of compound (1) were calculated using method: DFT B3LYP/6-311(d,p) <sup>2</sup>.

Atomic coordinates for calculated geometries of compound 1 in gas phase:

E(RB3LYP) = -4753.82593905 A.U.

Cartesian coordinates

| Center Number | Atomic Number | Forces (Hartrees/Bohr) |              |              |
|---------------|---------------|------------------------|--------------|--------------|
|               |               | X                      | Y            | Z            |
| 1             | 6             | -0.000002905           | -0.000000889 | 0.000004184  |
| 2             | 6             | 0.000004516            | 0.000001710  | -0.000004897 |
| 3             | 6             | 0.000001856            | -0.000001683 | -0.000000660 |
| 4             | 6             | 0.000008184            | 0.000002683  | 0.000008056  |
| 5             | 6             | -0.000004052           | 0.000002787  | -0.000002321 |
| 6             | 6             | 0.000002699            | -0.000000108 | 0.000001878  |
| 7             | 8             | -0.000008098           | 0.000000538  | 0.000010193  |
| 8             | 8             | -0.000007454           | -0.000004522 | -0.000010811 |
| 9             | 1             | 0.000000917            | 0.000001025  | -0.000000034 |
| 10            | 6             | 0.000003458            | 0.000000128  | -0.000000675 |
| 11            | 6             | -0.000003075           | -0.000000767 | 0.000000305  |
| 12            | 6             | 0.000004421            | -0.000000308 | 0.000001432  |
| 13            | 6             | -0.000001006           | -0.000002769 | 0.000000974  |
| 14            | 6             | -0.000000115           | -0.000002416 | 0.000000202  |
| 15            | 6             | 0.000002178            | 0.000000950  | -0.000000066 |
| 16            | 6             | 0.000001341            | -0.000004066 | 0.000001459  |
| 17            | 8             | -0.000003501           | -0.000002899 | -0.000003636 |
| 18            | 1             | -0.000000023           | 0.000000822  | -0.000000204 |
| 19            | 6             | -0.000002660           | 0.000004214  | 0.000004400  |
| 20            | 6             | 0.000001076            | -0.000002093 | -0.000000157 |
| 21            | 6             | -0.000000138           | 0.000000273  | 0.000002834  |
| 22            | 6             | 0.000000632            | 0.000000475  | -0.000002941 |
| 23            | 6             | 0.000001245            | -0.000002653 | 0.000003120  |
| 24            | 6             | 0.000002929            | -0.000000370 | 0.000004143  |
| 25            | 6             | 0.000000556            | 0.000000782  | 0.000000300  |
| 26            | 8             | 0.000004020            | -0.000002172 | -0.000002455 |
| 27            | 8             | 0.000000503            | 0.000001034  | -0.000007088 |
| 28            | 1             | 0.000000997            | 0.000001890  | 0.000000354  |
| 29            | 6             | -0.000004797           | 0.000001971  | 0.000000305  |
| 30            | 6             | 0.000009089            | -0.000002018 | -0.000003042 |
| 31            | 6             | 0.000002002            | 0.000000118  | 0.000011576  |
| 32            | 6             | -0.000001277           | -0.000003417 | 0.000004231  |
| 33            | 6             | 0.000004328            | -0.000003593 | 0.000002019  |
| 34            | 6             | -0.000006042           | 0.000004020  | 0.000003570  |
| 35            | 6             | -0.000002461           | 0.000002472  | -0.000005178 |

(1) <sup>2</sup> Frisch, M. J.; Trucks, G. W.; Schlegel, H. B.; Scuseria, G. E.; Robb, M. A.; Cheeseman, J. R.; Scalmani, G.; Barone, V.; Mennucci, B.; Petersson, G. A.; Nakatsuji, H.; Caricato, M.; Li, X.; Hratchian, H. P.; Izmaylov, A. F.; Bloino, J.; Zheng, G.; Sonnenberg, J. L.; Hada, M.; Ehara, M.; Toyota, K.; Fukuda, R.; Hasegawa, J.; Ishida, M.; Nakajima, T.; Honda, Y.; Kitao, O.; Nakai, H.; Vreven, T.; Montgomery, J. A., Jr.; Peralta, J. E.; Ogliaro, F.; Bearpark, M.; Heyd, J. J.; Brothers, E.; Kudin, K. N.; Staroverov, V. N.; Kobayashi, R.; Normand, J.; Raghavachari, K.; Rendell, A.; Burant, J. C.; Iyengar, S. S.; Tomasi, J.; Cossi, M.; Rega, N.; Millam, J. M.; Klene, M.; Knox, J. E.; Cross, J. B.; Bakken, V.; Adamo, C.; Jaramillo, J.; Gomperts, R.; Stratmann, R. E.; Yazyev, O.; Austin, A. J.; Cammi, R.; Pomelli, C.; Ochterski, J. W.; Martin, R. L.; Morokuma, K.; Zakrzewski, V. G.; Voth, G. A.; Salvador, P.; Dannenberg, J. J.; Dapprich, S.; Daniels, A. D.; Farkas, Ö.; Foresman, J. B.; Ortiz, J. V.; Cioslowski, J.; Fox, D. J. *Gaussian 09, Revision D.01*, Gaussian, Inc., Wallingford CT, **2009**.

|     |   |              |              |              |
|-----|---|--------------|--------------|--------------|
| 36  | 8 | -0.000006321 | 0.000005152  | -0.000003688 |
| 37  | 8 | 0.000001821  | 0.000005095  | -0.000001641 |
| 38  | 1 | 0.000000408  | -0.000000338 | -0.000000298 |
| 39  | 6 | 0.000003586  | -0.000000720 | -0.000002127 |
| 40  | 6 | -0.000004088 | -0.000000372 | -0.000001793 |
| 41  | 6 | 0.000002629  | -0.000002952 | -0.000005204 |
| 42  | 1 | 0.000000105  | 0.000000143  | 0.000000455  |
| 43  | 6 | 0.000000496  | -0.000003502 | -0.000000585 |
| 44  | 1 | -0.000001723 | 0.000000150  | -0.000002157 |
| 45  | 6 | -0.000003395 | -0.000001074 | -0.000001156 |
| 46  | 1 | 0.000000256  | 0.000004031  | -0.000000760 |
| 47  | 1 | -0.000001154 | 0.000000928  | -0.000000662 |
| 48  | 1 | 0.000000161  | 0.000000914  | 0.000000863  |
| 49  | 6 | -0.000000455 | -0.000002624 | 0.000002327  |
| 50  | 1 | -0.000000535 | -0.000000629 | 0.000000120  |
| 51  | 1 | 0.000000670  | 0.000000947  | 0.000001489  |
| 52  | 6 | -0.000000382 | -0.000001745 | 0.000000834  |
| 53  | 6 | 0.000000042  | -0.000001907 | -0.000001667 |
| 54  | 1 | -0.000001825 | 0.000000770  | 0.000000827  |
| 55  | 1 | 0.000001431  | 0.000000677  | 0.000000153  |
| 56  | 1 | -0.000000006 | -0.000001484 | -0.000000879 |
| 57  | 1 | -0.000001703 | 0.000001038  | 0.000001078  |
| 58  | 6 | 0.000002413  | 0.000003793  | -0.000000593 |
| 59  | 1 | 0.000000466  | -0.000000203 | 0.000000542  |
| 60  | 6 | -0.000002974 | -0.000003198 | -0.000003228 |
| 61  | 1 | -0.000001069 | 0.000000865  | 0.000000787  |
| 62  | 1 | -0.000000998 | 0.000000737  | 0.000000028  |
| 63  | 1 | 0.000000562  | -0.000001413 | 0.000002442  |
| 64  | 1 | 0.000001839  | -0.000000642 | -0.000004162 |
| 65  | 1 | -0.000002660 | 0.000000362  | -0.000005415 |
| 66  | 1 | 0.000001756  | -0.000000591 | -0.000000882 |
| 67  | 8 | 0.000006833  | -0.000001963 | -0.000003056 |
| 68  | 6 | -0.000001679 | -0.000003727 | -0.000000033 |
| 69  | 1 | 0.000001222  | 0.000002167  | 0.000001420  |
| 70  | 6 | 0.000000313  | -0.000002173 | 0.000000407  |
| 71  | 1 | -0.000002225 | 0.000000298  | -0.000000476 |
| 72  | 6 | 0.000002003  | 0.000001410  | -0.000001459 |
| 73  | 6 | -0.000001480 | 0.000005925  | 0.000000061  |
| 74  | 6 | 0.000000103  | 0.000000715  | -0.000001506 |
| 75  | 6 | -0.000005587 | -0.000001131 | 0.000004097  |
| 76  | 8 | 0.000006477  | 0.000004264  | -0.000007478 |
| 77  | 6 | -0.000009842 | -0.000005338 | 0.000009725  |
| 78  | 8 | 0.000003602  | -0.000001399 | 0.000001772  |
| 79  | 8 | -0.000001946 | -0.000003427 | -0.000007942 |
| 80  | 6 | -0.000000523 | -0.000000669 | -0.000000010 |
| 81  | 6 | -0.000000186 | 0.000000597  | -0.000000400 |
| 82  | 6 | -0.000001056 | 0.000000194  | 0.000000443  |
| 83  | 6 | 0.000001429  | 0.000000573  | -0.000002120 |
| 84  | 6 | -0.000004426 | -0.000002775 | 0.000000649  |
| 85  | 6 | -0.000002812 | 0.000001361  | -0.000000941 |
| 86  | 6 | -0.000000497 | -0.000001109 | 0.000001053  |
| 87  | 6 | 0.000003050  | -0.000003700 | 0.000002747  |
| 88  | 8 | -0.000005602 | 0.000004012  | -0.000000958 |
| 89  | 6 | 0.000003900  | -0.000000767 | -0.000005178 |
| 90  | 8 | -0.000003210 | 0.000001658  | 0.000003649  |
| 91  | 6 | -0.000000737 | -0.000000056 | 0.000000148  |
| 92  | 6 | -0.000000780 | -0.000000666 | 0.000000522  |
| 93  | 6 | -0.000000295 | -0.000001740 | 0.000000276  |
| 94  | 6 | -0.000001502 | 0.000000919  | 0.000000052  |
| 95  | 8 | 0.000003653  | -0.000001959 | 0.000002972  |
| 96  | 6 | 0.000001417  | 0.000001357  | 0.000000569  |
| 97  | 6 | -0.000003869 | -0.000002210 | -0.000000683 |
| 98  | 6 | 0.000005058  | 0.000001880  | -0.000000631 |
| 99  | 8 | -0.000004393 | -0.000006640 | -0.000001346 |
| 100 | 6 | 0.000003971  | 0.000012252  | 0.000008712  |
| 101 | 8 | -0.000000482 | -0.000003878 | -0.000004639 |
| 102 | 6 | -0.000000146 | -0.000001868 | 0.000000214  |
| 103 | 6 | 0.000000603  | -0.000001739 | -0.000000437 |
| 104 | 8 | 0.000003968  | -0.000000878 | -0.000003166 |



|     |   |              |              |              |
|-----|---|--------------|--------------|--------------|
| 105 | 6 | 0.000000519  | -0.000000456 | 0.000000275  |
| 106 | 6 | 0.000001079  | -0.000000893 | 0.000000746  |
| 107 | 6 | 0.000000699  | 0.000000069  | -0.000000290 |
| 108 | 6 | -0.000000114 | -0.000001574 | 0.000000486  |
| 109 | 6 | -0.000005810 | 0.000008192  | 0.000006719  |
| 110 | 6 | -0.000005478 | 0.000002801  | -0.000007062 |
| 111 | 8 | 0.000008823  | 0.000002489  | 0.000006271  |
| 112 | 6 | -0.000003970 | -0.000015502 | -0.000011586 |
| 113 | 8 | 0.000001010  | 0.000006555  | 0.000008135  |
| 114 | 6 | 0.000004577  | 0.000002195  | -0.000009239 |
| 115 | 6 | 0.000001657  | -0.000000925 | 0.000001022  |
| 116 | 8 | 0.000001061  | -0.000005321 | 0.000004093  |
| 117 | 6 | -0.000001874 | 0.000002265  | -0.000000326 |
| 118 | 6 | -0.000000685 | 0.000001404  | 0.000000533  |
| 119 | 6 | -0.000000885 | 0.000000084  | -0.000001620 |
| 120 | 6 | 0.000002694  | 0.000003496  | 0.000001458  |
| 121 | 1 | -0.000000633 | 0.000001445  | 0.000000976  |
| 122 | 1 | 0.000003206  | 0.000000193  | 0.000001047  |
| 123 | 1 | 0.000000389  | 0.000000434  | 0.000000488  |
| 124 | 1 | -0.000000213 | -0.000000148 | 0.000000263  |
| 125 | 1 | -0.000000923 | -0.000001562 | 0.000000033  |
| 126 | 1 | 0.000001153  | 0.000001539  | -0.000000146 |
| 127 | 1 | 0.000001491  | 0.000001790  | 0.000000639  |
| 128 | 1 | -0.000000949 | 0.000000070  | -0.000000145 |
| 129 | 1 | -0.000000521 | 0.000000549  | -0.000000042 |
| 130 | 1 | -0.000000649 | 0.000000020  | -0.000000303 |
| 131 | 1 | -0.000000788 | -0.000000026 | 0.000000074  |
| 132 | 1 | -0.000000656 | -0.000000954 | 0.000000429  |
| 133 | 1 | -0.000000675 | -0.000000934 | 0.000000245  |
| 134 | 1 | -0.000000377 | -0.000000682 | 0.000000106  |
| 135 | 1 | -0.000000024 | -0.000000943 | 0.000000107  |
| 136 | 1 | -0.000001021 | -0.000001164 | 0.000000449  |
| 137 | 1 | 0.000000393  | 0.000000316  | -0.000001250 |
| 138 | 1 | -0.000000508 | -0.000000702 | -0.000000589 |
| 139 | 1 | 0.000001356  | 0.000000773  | 0.000002335  |
| 140 | 1 | 0.000001219  | -0.000000746 | -0.000000162 |
| 141 | 1 | 0.000000973  | -0.000000486 | 0.000000065  |
| 142 | 1 | 0.000000980  | -0.000000341 | 0.000000150  |
| 143 | 1 | 0.000001101  | -0.000000052 | 0.000000141  |
| 144 | 1 | -0.000000425 | 0.000003260  | 0.000000837  |
| 145 | 1 | 0.000001626  | 0.000000971  | 0.000000102  |
| 146 | 1 | 0.000000532  | 0.000001118  | -0.000000403 |
| 147 | 1 | -0.000000125 | 0.000001329  | 0.000000321  |
| 148 | 1 | -0.000000790 | 0.000001020  | -0.000000225 |
| 149 | 6 | 0.000001184  | 0.000001225  | -0.000001203 |
| 150 | 6 | 0.000000338  | -0.000000321 | 0.000000232  |
| 151 | 6 | 0.000000805  | -0.000000245 | -0.000000245 |
| 152 | 6 | 0.000001137  | 0.000001992  | 0.000000428  |
| 153 | 6 | -0.000000119 | 0.000000109  | -0.000001392 |
| 154 | 6 | 0.000000848  | 0.000000994  | 0.000001456  |
| 155 | 6 | -0.000001895 | -0.000000392 | 0.000000607  |
| 156 | 6 | -0.000001346 | -0.000001060 | -0.000001271 |
| 157 | 1 | 0.000000312  | -0.000001209 | -0.000000794 |
| 158 | 1 | 0.000000157  | -0.000001047 | 0.000000112  |
| 159 | 1 | 0.000000920  | 0.000001046  | -0.000000478 |
| 160 | 1 | 0.000000059  | 0.000000553  | 0.000000415  |
| 161 | 1 | 0.000000553  | 0.000000305  | -0.000000176 |
| 162 | 1 | -0.000000019 | 0.000000441  | 0.000000451  |
| 163 | 1 | 0.000000260  | 0.000000088  | -0.000000397 |
| 164 | 1 | 0.000000447  | 0.000000992  | 0.000000587  |
| 165 | 1 | 0.000000568  | 0.000000531  | -0.000000056 |
| 166 | 1 | -0.000000072 | 0.000001003  | -0.000000123 |
| 167 | 1 | 0.000000153  | -0.000000584 | 0.000000112  |
| 168 | 1 | 0.000000115  | 0.000000140  | 0.000000274  |
| 169 | 1 | 0.000000030  | 0.000000118  | 0.000000123  |
| 170 | 1 | 0.000000790  | -0.000000290 | 0.000000426  |
| 171 | 1 | -0.000001751 | -0.000000697 | -0.000000265 |
| 172 | 1 | -0.000000157 | -0.000000307 | 0.000000588  |
| 173 | 1 | -0.000000093 | 0.000001378  | 0.000001764  |

|     |   |              |              |              |
|-----|---|--------------|--------------|--------------|
| 174 | 1 | -0.000000629 | -0.000000787 | 0.000000673  |
| 175 | 1 | -0.000000303 | 0.000000355  | -0.000000297 |
| 176 | 1 | -0.000000316 | -0.000000116 | -0.000000212 |
| 177 | 1 | -0.000000665 | -0.000000158 | 0.000000129  |
| 178 | 1 | -0.000000460 | -0.000000578 | -0.000000002 |
| 179 | 1 | -0.000000250 | 0.000000691  | 0.000000367  |
| 180 | 1 | -0.000000048 | 0.000000180  | -0.000000083 |
| 181 | 1 | -0.000000659 | 0.000000373  | -0.000000312 |
| 182 | 1 | -0.000000468 | 0.000000735  | 0.000000238  |
| 183 | 1 | -0.000000558 | 0.000000029  | -0.000000306 |
| 184 | 1 | -0.000000341 | 0.000000417  | 0.000000028  |

Atomic coordinates for calculated geometries of compound **1** in CHCl<sub>3</sub>:

E(RB3LYP) = -4753.87529866 A.U

Cartesian coordinates

| Center | Atomic | Forces (Hartrees/Bohr) |              |              |
|--------|--------|------------------------|--------------|--------------|
| Number | Number | X                      | Y            | Z            |
| 1      | 6      | 0.000005857            | -0.000001487 | -0.000003728 |
| 2      | 6      | -0.000002523           | 0.000000560  | 0.000003851  |
| 3      | 6      | -0.000002057           | 0.000002297  | -0.000002832 |
| 4      | 6      | -0.000000238           | 0.000001290  | 0.000000947  |
| 5      | 6      | 0.000000108            | -0.000000002 | -0.000004373 |
| 6      | 6      | -0.000002941           | 0.000003239  | 0.000001997  |
| 7      | 8      | 0.000002499            | -0.000002083 | 0.000002441  |
| 8      | 8      | 0.000000147            | -0.000002113 | 0.000005079  |
| 9      | 1      | 0.000000815            | -0.000001362 | -0.000001058 |
| 10     | 6      | 0.000004696            | -0.000002826 | 0.000003066  |
| 11     | 6      | -0.000008587           | 0.000003226  | -0.000001540 |
| 12     | 6      | 0.000004597            | -0.000000103 | 0.000006657  |
| 13     | 6      | -0.000002596           | -0.000000157 | 0.000002621  |
| 14     | 6      | -0.000002210           | 0.000003422  | -0.000004934 |
| 15     | 6      | 0.000003143            | 0.000000318  | -0.000001275 |
| 16     | 6      | 0.000001341            | 0.000000094  | 0.000004583  |
| 17     | 8      | -0.000003499           | 0.000001082  | -0.000003416 |
| 18     | 1      | 0.000000086            | 0.000000001  | -0.000001514 |
| 19     | 6      | 0.000003372            | -0.000003613 | -0.000000425 |
| 20     | 6      | -0.000002346           | 0.000000715  | 0.000006351  |
| 21     | 6      | -0.000002544           | 0.000000561  | -0.000002632 |
| 22     | 6      | 0.000005220            | -0.000001098 | -0.000001332 |
| 23     | 6      | -0.000002345           | -0.000001695 | 0.000010886  |
| 24     | 6      | 0.000001583            | -0.000005795 | -0.000001737 |
| 25     | 6      | -0.000002836           | 0.000003059  | -0.000000839 |
| 26     | 8      | -0.000000285           | 0.000001831  | -0.000002475 |
| 27     | 8      | -0.000004969           | 0.000003455  | -0.000003120 |
| 28     | 1      | -0.000000742           | 0.000001261  | 0.000000348  |
| 29     | 6      | -0.000006175           | 0.000001193  | 0.000002597  |
| 30     | 6      | 0.000008724            | -0.000003072 | -0.000003663 |
| 31     | 6      | -0.000001143           | 0.000002872  | -0.000004241 |
| 32     | 6      | 0.000004537            | -0.000009476 | -0.000004887 |
| 33     | 6      | -0.000012509           | -0.000001076 | 0.000005120  |
| 34     | 6      | 0.000003301            | -0.000001794 | -0.000002375 |
| 35     | 6      | -0.000002787           | -0.000001320 | 0.000003025  |
| 36     | 8      | 0.000002550            | -0.000000468 | -0.000000027 |
| 37     | 8      | 0.000004828            | 0.000001609  | -0.000005758 |
| 38     | 1      | 0.000000783            | -0.000000100 | -0.000001177 |
| 39     | 6      | -0.000002675           | 0.000002670  | -0.000000723 |
| 40     | 6      | -0.000002617           | 0.000000913  | -0.000001685 |
| 41     | 6      | -0.000001375           | -0.000001323 | 0.000005641  |
| 42     | 1      | 0.000001185            | 0.000002612  | -0.000000668 |
| 43     | 6      | -0.000000354           | -0.000001287 | -0.000002664 |
| 44     | 1      | 0.000000556            | 0.000001619  | -0.000002356 |

|     |   |              |              |               |
|-----|---|--------------|--------------|---------------|
| 45  | 6 | 0.000002171  | 0.000001121  | -0.000002264  |
| 46  | 1 | 0.000000316  | -0.000002046 | -0.000001735  |
| 47  | 1 | 0.000000850  | 0.000001106  | 0.000001036   |
| 48  | 1 | 0.000000570  | 0.000001192  | 0.000000915   |
| 49  | 6 | 0.000001755  | -0.000005043 | 0.000001885   |
| 50  | 1 | 0.000000676  | 0.000000231  | 0.000000260   |
| 51  | 1 | 0.000002364  | 0.000000199  | -0.000001162  |
| 52  | 6 | 0.000004541  | 0.000000360  | -0.000003119  |
| 53  | 6 | 0.000000126  | 0.000001241  | 0.000002202   |
| 54  | 1 | 0.000000773  | -0.000000021 | 0.000001016   |
| 55  | 1 | 0.000000021  | -0.000000329 | -0.000000106  |
| 56  | 1 | 0.000000270  | 0.000000370  | 0.000000976   |
| 57  | 1 | 0.000001400  | 0.000000822  | 0.000000602   |
| 58  | 6 | -0.000001670 | -0.000001109 | 0.000001622   |
| 59  | 1 | -0.000000130 | 0.000000830  | -0.000000182  |
| 60  | 6 | -0.000004423 | 0.000003539  | 0.000002562   |
| 61  | 1 | 0.000000593  | 0.000001627  | 0.000000996   |
| 62  | 1 | -0.000002257 | 0.000000589  | 0.000005999   |
| 63  | 1 | -0.000001657 | -0.000002509 | -0.000010482  |
| 64  | 1 | 0.000001942  | -0.000002505 | -0.000002617  |
| 65  | 1 | 0.000000846  | -0.000001607 | 0.000001849   |
| 66  | 1 | 0.000000699  | 0.000002851  | 0.000000877   |
| 67  | 8 | -0.000007764 | -0.000004352 | 0.000003606   |
| 68  | 6 | -0.000001875 | -0.000004103 | 0.000001161   |
| 69  | 1 | 0.000000496  | 0.000002782  | -0.000001143  |
| 70  | 6 | 0.000000935  | -0.000003984 | -0.000001008  |
| 71  | 1 | 0.000007696  | 0.000011322  | 0.000004076   |
| 72  | 6 | -0.000003021 | 0.000004325  | -0.000001102  |
| 73  | 6 | 0.000000209  | -0.000000803 | -0.000001826  |
| 74  | 6 | 0.000001060  | 0.000002606  | 0.000001461   |
| 75  | 6 | -0.000004616 | -0.000000927 | 0.000002077   |
| 76  | 8 | 0.000002542  | 0.000001708  | -0.000002690  |
| 77  | 6 | 0.000002922  | 0.000000893  | 0.000005610   |
| 78  | 8 | -0.000002033 | -0.000001007 | -0.000001429  |
| 79  | 8 | -0.000000668 | 0.000000587  | -0.000003167  |
| 80  | 6 | -0.000002389 | -0.000000660 | -0.000001277  |
| 81  | 6 | 0.000000964  | -0.000001113 | 0.000000032   |
| 82  | 6 | -0.000002178 | 0.000001568  | 0.000000576   |
| 83  | 6 | 0.000000367  | 0.000000295  | -0.000000918  |
| 84  | 6 | -0.000005462 | 0.000003421  | -0.000003180  |
| 85  | 6 | -0.000002684 | 0.000000002  | 0.000002348   |
| 86  | 6 | 0.000000026  | 0.000001501  | 0.000002281   |
| 87  | 6 | 0.000001214  | -0.000001526 | 0.000003275   |
| 88  | 8 | -0.000005405 | 0.000004270  | -0.000000229  |
| 89  | 6 | 0.000023202  | 0.000002959  | 0.000012015   |
| 90  | 8 | -0.000009111 | -0.000004641 | -0.000008608  |
| 91  | 6 | 0.000000903  | 0.000001077  | 0.000001643   |
| 92  | 6 | 0.000001201  | 0.000002292  | 0.000000949   |
| 93  | 6 | 0.000001203  | 0.000000796  | 0.000002868   |
| 94  | 6 | 0.000000187  | 0.000002613  | 0.000000466   |
| 95  | 8 | 0.000005591  | 0.000001712  | 0.000000708   |
| 96  | 6 | 0.000000776  | 0.000000580  | 0.000000175   |
| 97  | 6 | -0.000005946 | 0.000002899  | 0.000001904   |
| 98  | 6 | 0.000000560  | 0.000000865  | -0.000001192  |
| 99  | 8 | -0.000002748 | -0.000001359 | -0.000001778  |
| 100 | 6 | 0.000003071  | -0.000001382 | 0.000001853   |
| 101 | 8 | -0.000002725 | -0.000001203 | 0.000001869   |
| 102 | 6 | 0.000001975  | 0.000002783  | 0.000004972   |
| 103 | 6 | -0.000000604 | 0.000000086  | -0.000000670  |
| 104 | 8 | -0.000000355 | -0.000005038 | -0.0000009102 |
| 105 | 6 | -0.000001582 | -0.000000959 | 0.000000279   |
| 106 | 6 | -0.000001698 | 0.000001371  | -0.000000311  |
| 107 | 6 | -0.000000693 | 0.000000779  | 0.000000014   |
| 108 | 6 | -0.000002770 | -0.000000389 | -0.000000313  |
| 109 | 6 | 0.000001395  | -0.000003185 | -0.000003324  |
| 110 | 6 | -0.000000843 | -0.000003083 | -0.000003109  |
| 111 | 8 | 0.000004453  | 0.000001557  | 0.000001981   |
| 112 | 6 | -0.000009353 | -0.000004895 | 0.000004051   |
| 113 | 8 | -0.000001104 | 0.000000495  | -0.000006787  |

|     |   |              |              |              |
|-----|---|--------------|--------------|--------------|
| 114 | 6 | -0.000002025 | -0.000010848 | 0.000005145  |
| 115 | 6 | -0.000000181 | -0.000000451 | -0.000003070 |
| 116 | 8 | 0.000002980  | 0.000010318  | -0.000007380 |
| 117 | 6 | 0.000000436  | -0.000002010 | -0.000000948 |
| 118 | 6 | -0.000001496 | -0.000003260 | -0.000000490 |
| 119 | 6 | -0.000000348 | -0.000001030 | -0.000003148 |
| 120 | 6 | 0.000001731  | -0.000000894 | -0.000002071 |
| 121 | 1 | 0.000001562  | 0.000005374  | -0.000000204 |
| 122 | 1 | -0.000001271 | -0.000002395 | 0.000002472  |
| 123 | 1 | -0.000000227 | -0.000000227 | 0.000000032  |
| 124 | 1 | -0.000002505 | 0.000000148  | -0.000000590 |
| 125 | 1 | -0.000001128 | 0.000000926  | -0.000001497 |
| 126 | 1 | 0.000000319  | 0.000001820  | 0.000002356  |
| 127 | 1 | -0.000000246 | -0.000001124 | 0.000000156  |
| 128 | 1 | -0.000000362 | 0.000000532  | -0.000000392 |
| 129 | 1 | -0.000001004 | 0.000000449  | -0.000000044 |
| 130 | 1 | -0.000000888 | -0.000000002 | -0.000000276 |
| 131 | 1 | -0.000000570 | 0.000000707  | 0.000000494  |
| 132 | 1 | 0.000000209  | 0.000001057  | 0.000001507  |
| 133 | 1 | 0.000000972  | 0.000001567  | 0.000002051  |
| 134 | 1 | 0.000001252  | 0.000001558  | 0.000001850  |
| 135 | 1 | 0.000001179  | 0.000001038  | 0.000001745  |
| 136 | 1 | 0.000000130  | 0.000001271  | 0.000001940  |
| 137 | 1 | -0.000000132 | -0.000000194 | 0.000000164  |
| 138 | 1 | -0.000000175 | -0.000000365 | -0.000002965 |
| 139 | 1 | -0.000000140 | 0.000002535  | 0.000002873  |
| 140 | 1 | -0.000001740 | 0.000000573  | -0.000000617 |
| 141 | 1 | -0.000001237 | 0.000000493  | 0.000000201  |
| 142 | 1 | -0.000001429 | 0.000000253  | -0.000000720 |
| 143 | 1 | -0.000001199 | 0.000000061  | -0.000000435 |
| 144 | 1 | -0.000000671 | -0.000003325 | -0.000000280 |
| 145 | 1 | 0.000000923  | -0.000000515 | -0.000001294 |
| 146 | 1 | -0.000000079 | -0.000002151 | -0.000001718 |
| 147 | 1 | 0.000000118  | -0.000001982 | -0.000001904 |
| 148 | 1 | -0.000000285 | -0.000001764 | -0.000001339 |
| 149 | 6 | 0.000000140  | -0.000002569 | -0.000001841 |
| 150 | 6 | 0.000001711  | -0.000002928 | -0.000001636 |
| 151 | 6 | 0.000000626  | -0.000000725 | 0.000000760  |
| 152 | 6 | -0.000000255 | 0.000000530  | -0.000000510 |
| 153 | 6 | -0.000000641 | -0.000000058 | 0.000000583  |
| 154 | 6 | 0.000000937  | 0.000005137  | 0.000000983  |
| 155 | 6 | -0.000000964 | -0.000000226 | -0.000001729 |
| 156 | 6 | 0.000002449  | -0.000002130 | 0.000000204  |
| 157 | 1 | 0.000000764  | 0.000000070  | 0.000000334  |
| 158 | 1 | -0.000000062 | 0.000000108  | 0.000000252  |
| 159 | 1 | 0.000000208  | -0.000000435 | -0.000000822 |
| 160 | 1 | 0.000001061  | -0.000001138 | 0.000000029  |
| 161 | 1 | 0.000000608  | -0.000000579 | -0.000000220 |
| 162 | 1 | 0.000000925  | -0.000000246 | -0.000000485 |
| 163 | 1 | 0.000000551  | -0.000000826 | -0.000000664 |
| 164 | 1 | -0.000001310 | -0.000000466 | 0.000000078  |
| 165 | 1 | 0.000000100  | -0.000001518 | -0.000000898 |
| 166 | 1 | 0.000000334  | -0.000000384 | 0.000000268  |
| 167 | 1 | 0.000000674  | 0.000000021  | 0.000000348  |
| 168 | 1 | 0.000000890  | 0.000000390  | 0.000000106  |
| 169 | 1 | 0.000000962  | 0.000000304  | 0.000000502  |
| 170 | 1 | -0.000000077 | -0.000000075 | -0.000000651 |
| 171 | 1 | 0.000001286  | -0.000000490 | 0.000000096  |
| 172 | 1 | 0.000000478  | 0.000000298  | 0.000000191  |
| 173 | 1 | 0.000000468  | 0.000001525  | 0.000002336  |
| 174 | 1 | 0.000001413  | 0.000000377  | 0.000000841  |
| 175 | 1 | 0.000001373  | 0.000001279  | 0.000000095  |
| 176 | 1 | 0.000001387  | -0.000001218 | 0.000001093  |
| 177 | 1 | 0.000000840  | 0.000000254  | 0.000001024  |
| 178 | 1 | 0.000002074  | 0.000000317  | 0.000000566  |
| 179 | 1 | -0.000000341 | -0.000001161 | -0.000000153 |
| 180 | 1 | -0.000000003 | 0.000000205  | -0.000000230 |
| 181 | 1 | 0.000001011  | -0.000000710 | 0.000000697  |
| 182 | 1 | 0.000001220  | -0.000001002 | -0.000000753 |

```

183  1    0.000000963 -0.000001218  0.000000057
184  1    0.000001058 -0.000000954 -0.000000424

```

Atomic coordinates for calculated geometries of compound **1** in DMSO:

E(RB3LYP) = -4753.89949933 A.U.

Cartesian coordinates

| Center<br>Number | Atomic<br>Number | X            | Y            | Z            |
|------------------|------------------|--------------|--------------|--------------|
| 1                | 6                | 0.000001893  | 0.000001804  | -0.000000673 |
| 2                | 6                | -0.000000148 | -0.000000408 | 0.000000788  |
| 3                | 6                | 0.000002231  | 0.000000463  | -0.000000380 |
| 4                | 6                | -0.000000013 | 0.000001236  | -0.000001786 |
| 5                | 6                | 0.000000928  | 0.000001900  | 0.000002052  |
| 6                | 6                | -0.000000753 | -0.000001668 | 0.000001917  |
| 7                | 8                | -0.000003261 | 0.000001492  | -0.000002150 |
| 8                | 8                | 0.000000976  | 0.000001539  | -0.000004833 |
| 9                | 1                | -0.000000082 | 0.000000634  | 0.000000919  |
| 10               | 6                | -0.000000788 | 0.000001438  | -0.000000177 |
| 11               | 6                | 0.000000583  | 0.000000930  | 0.000000326  |
| 12               | 6                | -0.000000568 | 0.000001259  | -0.000002178 |
| 13               | 6                | 0.000000191  | 0.000003031  | -0.000000773 |
| 14               | 6                | -0.000002743 | -0.000001171 | 0.000000016  |
| 15               | 6                | 0.000005115  | 0.000000335  | -0.000000319 |
| 16               | 6                | -0.000000730 | -0.000000879 | 0.000001538  |
| 17               | 8                | 0.000002160  | -0.000000879 | 0.000001725  |
| 18               | 1                | -0.000000217 | -0.000000356 | 0.000000182  |
| 19               | 6                | -0.000002597 | -0.000000396 | -0.000000374 |
| 20               | 6                | -0.000000527 | 0.000001610  | 0.000000521  |
| 21               | 6                | -0.000000179 | 0.000000702  | -0.000001519 |
| 22               | 6                | 0.000000957  | -0.000000771 | 0.000000384  |
| 23               | 6                | -0.000000654 | -0.000002604 | -0.000003029 |
| 24               | 6                | -0.000002342 | 0.000000852  | -0.000001587 |
| 25               | 6                | -0.000000028 | -0.000000401 | 0.000000244  |
| 26               | 8                | -0.000001369 | -0.000000632 | -0.000001215 |
| 27               | 8                | -0.000003054 | 0.000000940  | 0.000002498  |
| 28               | 1                | -0.000000598 | -0.000000607 | -0.000000449 |
| 29               | 6                | 0.000001949  | 0.000000408  | 0.000000985  |
| 30               | 6                | -0.000000985 | -0.000002341 | -0.000000919 |
| 31               | 6                | -0.000001057 | -0.000001855 | -0.000002366 |
| 32               | 6                | 0.000000507  | 0.000003252  | 0.000000332  |
| 33               | 6                | 0.000002586  | 0.000001576  | -0.000004516 |
| 34               | 6                | 0.000000656  | -0.000001151 | -0.000000045 |
| 35               | 6                | -0.000001435 | 0.000001387  | 0.000000007  |
| 36               | 8                | -0.000000577 | -0.000001437 | -0.000000840 |
| 37               | 8                | -0.000001623 | -0.000004940 | 0.000003790  |
| 38               | 1                | 0.000000257  | -0.000000623 | -0.000000332 |
| 39               | 6                | -0.000000696 | 0.000000277  | -0.000000073 |
| 40               | 6                | 0.000000086  | 0.000000244  | 0.000000469  |
| 41               | 6                | -0.000000182 | -0.000001902 | 0.000000705  |
| 42               | 1                | 0.000000215  | -0.000000636 | -0.000000386 |
| 43               | 6                | 0.000000852  | -0.000000767 | 0.000000327  |
| 44               | 1                | 0.000000478  | 0.000000595  | 0.000000065  |
| 45               | 6                | 0.000001187  | 0.000000961  | 0.000000836  |
| 46               | 1                | -0.000001047 | -0.000000574 | 0.000000189  |
| 47               | 1                | 0.000000690  | 0.000000219  | 0.000000514  |
| 48               | 1                | 0.000001066  | 0.000000071  | 0.000001170  |
| 49               | 6                | 0.000001937  | -0.000000668 | 0.000001252  |
| 50               | 1                | 0.000000086  | 0.000000149  | -0.000000361 |
| 51               | 1                | 0.000001334  | -0.000000305 | -0.000000610 |

|     |   |              |              |              |
|-----|---|--------------|--------------|--------------|
| 52  | 6 | 0.000000401  | -0.000000087 | 0.000000412  |
| 53  | 6 | 0.000000119  | 0.000000005  | -0.000000560 |
| 54  | 1 | 0.000001415  | -0.000000805 | -0.000000376 |
| 55  | 1 | -0.000000152 | -0.000000573 | 0.000000284  |
| 56  | 1 | 0.000000405  | -0.000000278 | 0.000000217  |
| 57  | 1 | -0.000000170 | -0.000000609 | 0.000000102  |
| 58  | 6 | 0.000000096  | -0.000000296 | 0.000000685  |
| 59  | 1 | 0.000000654  | -0.000000124 | 0.000001313  |
| 60  | 6 | 0.000001438  | -0.000002097 | -0.000001492 |
| 61  | 1 | -0.000000096 | 0.000000850  | 0.000002012  |
| 62  | 1 | 0.000000626  | -0.000000310 | 0.000000666  |
| 63  | 1 | -0.000001018 | -0.000001044 | -0.000003693 |
| 64  | 1 | 0.000000188  | 0.000000306  | -0.000001421 |
| 65  | 1 | 0.000000068  | 0.000002084  | -0.000000421 |
| 66  | 1 | -0.000001494 | -0.000000624 | -0.000001044 |
| 67  | 8 | 0.000002746  | 0.000003171  | 0.000002454  |
| 68  | 6 | -0.000001803 | 0.000001042  | -0.000001287 |
| 69  | 1 | 0.000000024  | -0.000001094 | 0.000001292  |
| 70  | 6 | -0.000000700 | 0.000000378  | 0.000001376  |
| 71  | 1 | -0.000001313 | -0.000002895 | 0.000001873  |
| 72  | 6 | 0.000001097  | 0.000000083  | 0.000001764  |
| 73  | 6 | -0.000000834 | -0.000000691 | -0.000001279 |
| 74  | 6 | -0.000000050 | 0.000000772  | 0.000000275  |
| 75  | 6 | 0.000001346  | 0.000000745  | -0.000000676 |
| 76  | 8 | -0.000000544 | -0.000000076 | -0.000000005 |
| 77  | 6 | -0.000000249 | 0.000006840  | 0.000003862  |
| 78  | 8 | -0.000001940 | -0.000002301 | 0.000002305  |
| 79  | 8 | 0.000001561  | 0.000001642  | 0.000001116  |
| 80  | 6 | -0.000000066 | 0.000000779  | 0.000000039  |
| 81  | 6 | -0.000000261 | 0.000000845  | 0.000000300  |
| 82  | 6 | 0.000000469  | 0.000001303  | 0.000000565  |
| 83  | 6 | -0.000001011 | 0.000001089  | 0.000001026  |
| 84  | 6 | 0.000000381  | 0.000000087  | 0.000000418  |
| 85  | 6 | -0.000000447 | 0.000000354  | 0.000002077  |
| 86  | 6 | 0.000000934  | 0.000000675  | -0.000000016 |
| 87  | 6 | -0.000000055 | 0.000001821  | 0.000000035  |
| 88  | 8 | 0.000001231  | -0.000000449 | 0.000000425  |
| 89  | 6 | -0.000002064 | 0.000002607  | 0.000001571  |
| 90  | 8 | 0.000001599  | -0.000001125 | -0.000000358 |
| 91  | 6 | 0.000000372  | 0.000000682  | 0.000001350  |
| 92  | 6 | 0.000000543  | 0.000000679  | 0.000001296  |
| 93  | 6 | 0.000000409  | 0.000001129  | 0.000001226  |
| 94  | 6 | 0.000000878  | -0.000000325 | 0.000001342  |
| 95  | 8 | -0.000001140 | 0.000003042  | 0.000000118  |
| 96  | 6 | 0.000000137  | -0.000000447 | -0.000000239 |
| 97  | 6 | 0.000002097  | 0.000000497  | -0.000000412 |
| 98  | 6 | -0.000003192 | -0.000000417 | -0.000000521 |
| 99  | 8 | 0.000000460  | 0.000001162  | -0.000002230 |
| 100 | 6 | -0.000003481 | -0.000002138 | -0.000000839 |
| 101 | 8 | 0.000002179  | 0.000001658  | -0.000000313 |
| 102 | 6 | -0.000001884 | 0.000000718  | -0.000003130 |
| 103 | 6 | -0.000001140 | 0.000001114  | -0.000000812 |
| 104 | 8 | -0.000001349 | -0.000000058 | 0.000004167  |
| 105 | 6 | -0.000000571 | 0.000000571  | -0.000000956 |
| 106 | 6 | -0.000000440 | 0.000000431  | -0.000001200 |
| 107 | 6 | -0.000001476 | -0.000000163 | -0.000001081 |
| 108 | 6 | 0.000000039  | -0.000000018 | -0.000001054 |
| 109 | 6 | -0.000001364 | 0.000002274  | 0.000000625  |
| 110 | 6 | 0.000001473  | -0.000000130 | 0.000002385  |
| 111 | 8 | -0.000003411 | -0.000001647 | -0.000002672 |
| 112 | 6 | 0.000005716  | -0.000001455 | -0.000004797 |
| 113 | 8 | -0.000001122 | 0.000000270  | 0.000002325  |
| 114 | 6 | 0.000000225  | 0.000002452  | -0.000006306 |
| 115 | 6 | 0.000000023  | -0.000002121 | 0.000000594  |
| 116 | 8 | -0.000001302 | -0.000004661 | 0.000003692  |
| 117 | 6 | 0.000000893  | -0.000000505 | 0.000000054  |
| 118 | 6 | 0.000000174  | -0.000000618 | -0.000001515 |
| 119 | 6 | 0.000000117  | -0.000001475 | 0.000000373  |
| 120 | 6 | -0.000000907 | -0.000001031 | -0.000001231 |

|     |   |              |              |              |
|-----|---|--------------|--------------|--------------|
| 121 | 1 | -0.000001258 | -0.000001904 | -0.000000640 |
| 122 | 1 | -0.000000600 | -0.000000628 | -0.000001416 |
| 123 | 1 | -0.000000407 | 0.000001151  | 0.000000441  |
| 124 | 1 | -0.000000132 | 0.000000023  | 0.000000117  |
| 125 | 1 | 0.000000105  | 0.000000534  | -0.000000015 |
| 126 | 1 | -0.000000032 | 0.000000683  | 0.000000363  |
| 127 | 1 | -0.000000548 | 0.000000318  | -0.000000541 |
| 128 | 1 | -0.000000019 | 0.000000762  | 0.000000203  |
| 129 | 1 | -0.000000230 | 0.000001128  | 0.000000305  |
| 130 | 1 | -0.000000205 | 0.000001347  | 0.000000442  |
| 131 | 1 | 0.000000045  | 0.000001355  | 0.000000494  |
| 132 | 1 | 0.000000754  | 0.000000785  | 0.000001199  |
| 133 | 1 | 0.000000627  | 0.000000999  | 0.000001299  |
| 134 | 1 | 0.000000633  | 0.000000768  | 0.000001341  |
| 135 | 1 | 0.000000588  | 0.000000529  | 0.000000918  |
| 136 | 1 | -0.000000433 | 0.000001701  | 0.000000064  |
| 137 | 1 | 0.000000444  | 0.000000443  | -0.000000147 |
| 138 | 1 | -0.000000026 | 0.000000009  | -0.000000673 |
| 139 | 1 | -0.000001473 | -0.000000964 | -0.000003476 |
| 140 | 1 | -0.000000568 | 0.000000945  | -0.000000368 |
| 141 | 1 | -0.000001033 | 0.000000390  | -0.000001068 |
| 142 | 1 | -0.000001051 | 0.000000036  | -0.000001341 |
| 143 | 1 | -0.000000979 | -0.000000051 | -0.000001392 |
| 144 | 1 | 0.000000885  | -0.000000136 | -0.000000823 |
| 145 | 1 | -0.000001056 | -0.000001898 | -0.000001252 |
| 146 | 1 | 0.000000186  | -0.000001415 | -0.000000708 |
| 147 | 1 | 0.000000064  | -0.000001368 | -0.000000611 |
| 148 | 1 | -0.000000024 | -0.000000733 | -0.000000622 |
| 149 | 6 | -0.000000011 | -0.000000959 | 0.000000075  |
| 150 | 6 | -0.000000284 | -0.000000763 | -0.000000637 |
| 151 | 6 | 0.000000037  | -0.000000558 | -0.000000135 |
| 152 | 6 | -0.000000419 | -0.000001735 | -0.000000489 |
| 153 | 6 | 0.000000002  | -0.000000108 | 0.000000502  |
| 154 | 6 | 0.000000492  | 0.000000502  | 0.000000670  |
| 155 | 6 | 0.000000647  | -0.000001061 | 0.000000365  |
| 156 | 6 | 0.000000533  | -0.000000754 | 0.000000768  |
| 157 | 1 | -0.000000343 | 0.000000227  | 0.000000065  |
| 158 | 1 | -0.000000048 | 0.000000154  | 0.000000050  |
| 159 | 1 | -0.000000240 | -0.000000883 | -0.000000230 |
| 160 | 1 | 0.000000767  | -0.000000648 | 0.000000117  |
| 161 | 1 | 0.000000152  | -0.000001127 | -0.000000266 |
| 162 | 1 | 0.000000295  | -0.000001060 | -0.000000336 |
| 163 | 1 | 0.000000271  | -0.000001273 | -0.000000451 |
| 164 | 1 | -0.000000234 | -0.000000808 | -0.000000294 |
| 165 | 1 | 0.000000060  | -0.000001205 | -0.000000477 |
| 166 | 1 | 0.000000268  | -0.000001229 | -0.000000769 |
| 167 | 1 | 0.000000206  | -0.000000582 | -0.000000084 |
| 168 | 1 | 0.000000321  | -0.000000408 | 0.000000240  |
| 169 | 1 | 0.000000420  | -0.000000637 | 0.000000128  |
| 170 | 1 | 0.000000195  | -0.000000524 | 0.000000315  |
| 171 | 1 | 0.000000458  | -0.000000408 | -0.000000137 |
| 172 | 1 | 0.000000249  | -0.000000464 | -0.000000331 |
| 173 | 1 | 0.000000401  | 0.000000034  | 0.000000561  |
| 174 | 1 | 0.000000564  | -0.000000059 | 0.000000962  |
| 175 | 1 | 0.000000766  | 0.000000078  | 0.000000794  |
| 176 | 1 | 0.000000681  | -0.000000089 | 0.000000893  |
| 177 | 1 | 0.000000634  | 0.000000171  | 0.000001002  |
| 178 | 1 | 0.000000812  | -0.000000034 | 0.000001103  |
| 179 | 1 | 0.000000222  | -0.000000189 | 0.000000537  |
| 180 | 1 | 0.000000095  | 0.000000108  | 0.000000582  |
| 181 | 1 | 0.000000319  | 0.000000033  | 0.000000704  |
| 182 | 1 | 0.000000628  | -0.000000389 | 0.000000597  |
| 183 | 1 | 0.000000443  | -0.000000562 | 0.000000320  |
| 184 | 1 | 0.000000232  | -0.000000401 | 0.000000277  |
